# Supplementary material for: Pd2+⋯O3SR− interaction encourages anion encapsulation of a quadruply-stranded Pd complex to achieve chirality or high solubility
Source: Royal Society of Chemistry journal article supplement (doi:10.1039/c1cc14982b), 2011-01-01
Supplement: c1cc14982b.pdf [file c1cc14982b.pdf]

**- Electronic Supplementary Information -**

**$\text{Pd}^{2+} \cdots \text{O}_3\text{SR}^-$  interaction encourages anion  
encapsulation of a quadruply-stranded Pd complex to  
achieve chirality or high solubility**

Ryo Sekiya and Reiko Kuroda\*

*Department of Life Sciences, Graduate School of Arts and Sciences, The University of Tokyo, 3-8-1  
Komaba, Meguro-ku, Tokyo 153-8902, Japan.*

ckuroda@mail.ecc.u-tokyo.ac.jp

# Contents

## Experimental Section

- Material and instruments ... S3
- Solid-state CD measurements ... S3
- X-ray crystallography ... S3
- NMR titrations ... S3
- **Table S1.** Crystallographic parameters ... S4
- Synthesis of **1**(OTf)<sub>4</sub>, **1**(*d*-camS)<sub>4</sub>, **1**(*l*-camS)<sub>4</sub>, and Na(DenS) ... S5–S6

## Supporting Figures

- **Fig. S1** Cavity volume of **1** ... S7
- **Fig. S2** Chemical shift change of H<sub>a</sub> upon dilution or addition of OTf<sup>−</sup> ... S7
- **Fig. S3** NMR titration experiment of OTs<sup>−</sup> ... S8
- **Fig. S4** NMR titration experiment of ONs<sup>−</sup> ... S8
- **Fig. S5** Observed and calculated ion peaks of [1+(OTs)<sub>2</sub>]<sup>2+</sup> and [1+(ONs)<sub>2</sub>]<sup>2+</sup> ... S9
- **Fig. S6** 2D NOESY spectrum of **1** in the presence of 4 equiv OTs<sup>−</sup> ... S9
- **Fig. S7** 2D NOESY spectrum of **1** in the presence of 4 equiv ONs<sup>−</sup> ... S10
- **Fig. S8** Coordination environment around the Pd<sup>2+</sup> centre of 1⊃(ONs)<sub>2</sub> ... S10
- **Fig. S9** Chemical shift change of *d*-camS<sup>−</sup> upon host-guest complexation ... S11
- **Fig. S10** 2D NOESY spectrum of **1** in the presence of 4 equiv *d*-camS<sup>−</sup> ... S11
- **Fig. S11** ESI MS spectrum of the DMSO-*d*<sub>6</sub> solution containing 1<sub>major</sub>⊃(*d*-cam)<sub>2</sub> and 1<sub>minor</sub>⊃(*d*-cam)<sub>2</sub>, and observed and calculated ion peaks of [1+(*d*-camS)]<sup>3+</sup> and [1+(*d*-camS)<sub>2</sub>]<sup>2+</sup> ... S12
- **Fig. S12** NMR titration experiment of *d*-camS<sup>−</sup> ... S13
- **Fig. S13** <sup>1</sup>H NMR spectrum of **1** in the presence of 1 equiv *d*-camS<sup>−</sup> ... S13
- **Fig. S14** Coordination environments around the Pd<sup>2+</sup> centres of 1⊃(*d*-camS)<sub>2</sub> ... S14
- **Fig. S15** Solid-state transmittance CD spectra of 1(*d*-camS)<sub>4</sub> and 1(*l*-camS)<sub>4</sub> ... S15
- **Fig. S16** Crystal structure of an interlocked metallohelicate ... S15
- **Fig. S17** 2D NOESY spectrum of **1** in the presence of 4 equiv DenS<sup>−</sup> ... S16
- **Fig. S18** Chemical shift change of DenS<sup>−</sup> upon host-guest complexation ... S16
- **Fig. S19** Observed and calculated ion peaks of [1+(DenS)<sub>2</sub>]<sup>2+</sup> ... S17
- **Fig. S20** <sup>1</sup>H NMR spectra (DMSO-*d*<sub>6</sub>+CD<sub>2</sub>Cl<sub>2</sub>) of **1** in the presence of 4 equiv DenS<sup>−</sup> ... S17
- **Fig. S21** <sup>1</sup>H NMR spectra (DMSO-*d*<sub>6</sub>+CDCl<sub>3</sub>) of **1** in the presence of 4 equiv DenS<sup>−</sup> ... S18
- **Fig. S22** <sup>1</sup>H NMR spectra (DMSO-*d*<sub>6</sub>+THF-*d*<sub>8</sub>) of **1** in the presence of 4 equiv DenS<sup>−</sup> ... S18
- **Fig. S23** NMR titration experiment of DenS<sup>−</sup> ... S19
- **Table S2.** Association constants log<sub>10</sub>(K<sub>a1</sub>) and log<sub>10</sub>(K<sub>a</sub>) in DMSO-*d*<sub>6</sub> ... S19
- Data fitting of the NMR titrations (OTs<sup>−</sup>, ONs<sup>−</sup> and DenS<sup>−</sup>) ... S20–S22

## References

- **References** ... S23

## Experimental Section

### Materials and Instrumentations

All chemicals and solvents were purchased from Kanto Chemical Co., Ltd., Wako Pure Chemical Co., Ltd., and Tokyo Kasei Kogyo Co., Ltd., and were used as received without further purification. Melting points were measured on Yanaco Micro Melting Point Apparatus 3120.  $^1\text{H}$  NMR (500MHz),  $^{13}\text{C}$  NMR (125 MHz), and  $^{19}\text{F}$  NMR (470 MHz) spectra were recorded on a JEOL  $\alpha$ -500 spectrometer. Unless stated otherwise, the chemical shift values reported here are with respect to DMSO ( $\delta = 2.48$  ppm ( $^1\text{H}$ ), 39.5 ppm ( $^{13}\text{C}$ )) or monofluorobenzene ( $\delta = -113.15$  ppm, ( $^{19}\text{F}$ )). ESI MS spectra were acquired on Mariner<sup>TM</sup> ESI-TOF Biospectrometry Workstation. Solution-state CD spectra were measured on a JASCO J-720 spectrometer.

### Solid-state CD Measurements

Solid-state CD spectra were recorded using Universal Chiroptical Spectrophotometer (UCS-1).<sup>1</sup> A crystal of compounds  $\mathbf{1}(d\text{-camS})_4$  (100  $\mu\text{g}$ ) or  $\mathbf{1}(l\text{-camS})_4$  (108  $\mu\text{g}$ ) and dry KBr matrix were finely ground, and the powder was pressed at 4.8 MP/  $\text{cm}^2$  for 10 min to prepare a clear disk of 1 cm diameter. The KBr disk, held by a specially devised disk holder, was placed normal to a light beam. True CD spectra in the solid state were obtained by a specially devised set of procedures based on the Stokes-Mueller matrix method.<sup>1</sup>

### X-ray Crystallography

Single crystals of  $\mathbf{1}(\text{ONs})_4$  were obtained from a DMF solution of  $\mathbf{1}(\text{ONs})_4$  at ca. 70 °C. Single crystals of  $\mathbf{1}(d\text{-camS})_4$  were obtained from a DMSO solution of  $\mathbf{1}(d\text{-camS})_4$  at rt. X-ray crystallographic data were collected on a Bruker SMART APEX CCD diffractometer using graphite-monochromatized Mo  $K\alpha$  radiation ( $\lambda = 0.71073$  Å) at 103 K. Crystallographic parameters are listed in Table S1. The crystal structures were solved by direct method using the *SHELXS-97* program and refined by successive differential Fourier syntheses and full-matrix least-squares procedures using the *SHELXL-97* program.<sup>2</sup> Anisotropic thermal factors were applied to all non-hydrogen atoms. In the case of  $\mathbf{1}(\text{ONs})_4$ , the diffuse electron density due to the disordered and unidentified moieties was treated with the SQUEEZE routine within the PLATON software package,<sup>3</sup> and the final  $d_{\text{calc}}$ , and Formula weight reflect known contents only. Computer graphics of the X-ray crystal structures were portrayed with Mercury 2.3 program.<sup>4</sup>

### NMR Titrations.

All titrations were performed with the starting concentration of  $\mathbf{1}(\text{OTf})_4$  at 1.0 mM (DMSO- $d_6$ ) and the addition of appropriate aliquots of titrant (0.5, 1.0, 1.5, 2.0, 3.0, 4.0, 5.0, 6.0, 7.0, and 8.0 equiv) to the NMR sample with a 40-200  $\mu\text{l}$  Finn timer<sup>®</sup> (ThermoLabsystems) as appropriate.  $\alpha$ -pyridyl protons  $\text{H}_a$  and  $\text{H}_b$  of  $\mathbf{1}$  were followed during the course of the titration, and the data were fitted and analyzed to give association constants ( $\log_{10}(K_{a1})$  and  $\log_{10}(K_a)$ ) using WinEQNMR2 program.<sup>5</sup>

**Table S1.** Crystallographic parameters

| Crystal                                       | <b>1</b> (ONs) <sub>4</sub>                                                                                                                | <b>1</b> ( <i>d</i> -camS) <sub>4</sub>                                                                                                                 |
|-----------------------------------------------|--------------------------------------------------------------------------------------------------------------------------------------------|---------------------------------------------------------------------------------------------------------------------------------------------------------|
| Formula                                       | [Pd <sub>2</sub> (C <sub>25</sub> H <sub>20</sub> N <sub>2</sub> O <sub>3</sub> ) <sub>4</sub> ]<br>(ONs) <sub>4</sub> ·(DMF) <sub>4</sub> | [Pd <sub>2</sub> (C <sub>25</sub> H <sub>20</sub> N <sub>2</sub> O <sub>3</sub> ) <sub>4</sub> ]<br>( <i>d</i> -camS) <sub>4</sub> ·(DMSO) <sub>6</sub> |
| Formula weight                                | 2919.81                                                                                                                                    | 3192.4                                                                                                                                                  |
| Crystal system                                | Triclinic                                                                                                                                  | Triclinic                                                                                                                                               |
| Space group                                   | <i>P</i> $\bar{1}$ (#2)                                                                                                                    | <i>P</i> 1 (#1)                                                                                                                                         |
| <i>a</i> / Å                                  | 14.075(6)                                                                                                                                  | 14.6994(11)                                                                                                                                             |
| <i>b</i> / Å                                  | 16.502(7)                                                                                                                                  | 16.5936(12)                                                                                                                                             |
| <i>c</i> / Å                                  | 19.601(8)                                                                                                                                  | 17.1117(12)                                                                                                                                             |
| $\alpha$ /°                                   | 92.546(7)                                                                                                                                  | 83.298(1)                                                                                                                                               |
| $\beta$ /°                                    | 108.332(7)                                                                                                                                 | 85.992(1)                                                                                                                                               |
| $\gamma$ /°                                   | 109.447(7)                                                                                                                                 | 63.960(1)                                                                                                                                               |
| <i>V</i> / Å <sup>3</sup>                     | 4018(3)                                                                                                                                    | 3723.7(5)                                                                                                                                               |
| <i>D</i> <sub>calc.</sub> /g cm <sup>-3</sup> | 1.21                                                                                                                                       | 1.42                                                                                                                                                    |
| <i>Z</i>                                      | 1                                                                                                                                          | 1                                                                                                                                                       |
| $2\theta_{\max}$ /°                           | 52.8                                                                                                                                       | 55.8                                                                                                                                                    |
| $\mu$ (MoK $\alpha$ )/mm <sup>-1</sup>        | 0.344                                                                                                                                      | 0.461                                                                                                                                                   |
| Temperature /K                                | 103                                                                                                                                        | 103                                                                                                                                                     |
| Crystal form                                  | block                                                                                                                                      | block                                                                                                                                                   |
| Crystal size /mm <sup>3</sup>                 | 0.2 × 0.1 × 0.05                                                                                                                           | 0.2 × 0.2 × 0.2                                                                                                                                         |
| Crystal colour                                | colourless                                                                                                                                 | colourless                                                                                                                                              |
| <i>h</i> range                                | -17 → 17                                                                                                                                   | -19 → 8                                                                                                                                                 |
| <i>k</i> range                                | -20 → 20                                                                                                                                   | -21 → 19                                                                                                                                                |
| <i>l</i> range                                | -24 → 23                                                                                                                                   | -22 → 21                                                                                                                                                |
| # of total reflections                        | 32666                                                                                                                                      | 23115                                                                                                                                                   |
| # of unique reflections                       | 16175                                                                                                                                      | 19148                                                                                                                                                   |
| # of observed reflections                     | 10148                                                                                                                                      | 17459                                                                                                                                                   |
| <i>R</i> <sub>int</sub>                       | 0.0722                                                                                                                                     | 0.0168                                                                                                                                                  |
| Criterion for observed reflections            | <i>I</i> > 2σ( <i>F</i> <sub>o</sub> )                                                                                                     | <i>I</i> > 2σ( <i>F</i> <sub>o</sub> )                                                                                                                  |
| <i>R</i> 1 (observed)                         | 0.0737                                                                                                                                     | 0.0361                                                                                                                                                  |
| <i>wR</i> 2 (observed)                        | 0.1735                                                                                                                                     | 0.0953                                                                                                                                                  |
| <i>G. O. F.</i>                               | 0.983                                                                                                                                      | 1.057                                                                                                                                                   |
| # of parameters used                          | 892                                                                                                                                        | 1875                                                                                                                                                    |
| $\Delta\rho_{\max}$ (eÅ <sup>-3</sup> )       | +1.152                                                                                                                                     | +1.515                                                                                                                                                  |
| $\Delta\rho_{\min}$ (eÅ <sup>-3</sup> )       | -0.766                                                                                                                                     | -0.637                                                                                                                                                  |
| Flack's parameter                             | -                                                                                                                                          | -0.018(13)                                                                                                                                              |
| CCDC number                                   | 742382                                                                                                                                     | 827758                                                                                                                                                  |

## Experimental Detail

### Synthesis of **1**(OTf)<sub>4</sub>

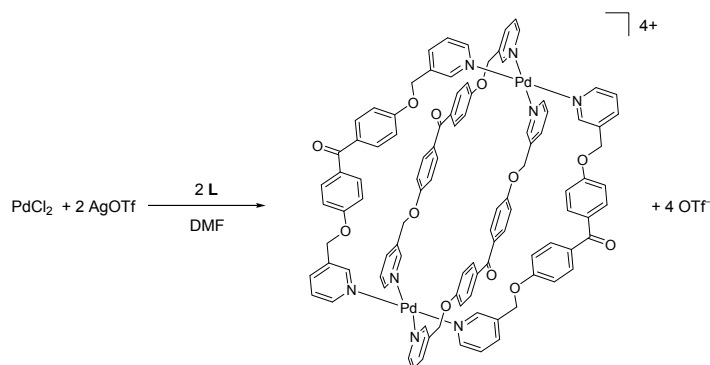

$\text{PdCl}_2$  (44.4 mg,  $2.50 \times 10^{-1}$  mmol) was dissolved in DMF (4 mL) and stirred for 1 h at room temperature with AgOTf (129 mg,  $5.00 \times 10^{-1}$  mmol). After removal of AgCl by filtration addition of compound **L**<sup>6</sup> (208 mg,  $5.25 \times 10^{-1}$  mmol) to the filtrate, the mixture was stirred for 1 h at 70 °C. Et<sub>2</sub>O (20 mL) was added to the resultant pale yellow solution. White precipitate was isolated by filtration and washed with CH<sub>2</sub>Cl<sub>2</sub> and dried in vacuo to give **1**(OTf)<sub>4</sub> in 91 % yield (272 mg,  $1.14 \times 10^{-1}$  mmol). <sup>1</sup>H NMR (500 MHz, DMSO-*d*<sub>6</sub>, rt):  $\delta$  9.40 (s, 8H), 9.33 (d,  $J = 5.8$  Hz, 8H), 8.16 (d,  $J = 7.6$  Hz, 8H), 7.82 (dd,  $J = 5.8, 7.6$  Hz, 8H), 7.54 (d,  $J = 8.5$  Hz, 16H), 7.10 (d,  $J = 8.5$  Hz, 16H), 5.29 (s, 16H); <sup>13</sup>C NMR (125 MHz, DMSO-*d*<sub>6</sub>, rt):  $\delta$  193.01, 160.92, 150.61, 149.09, 139.79, 136.22, 131.65, 130.74, 127.12, 114.35, 66.57; <sup>19</sup>F NMR (470 MHz, DMSO-*d*<sub>6</sub>, rt):  $\delta$  -77.8 (s); MS (ESI,  $m/z$ ) calcd for C<sub>100</sub>H<sub>80</sub>N<sub>8</sub>O<sub>12</sub>Pd<sub>2</sub>(OTf)<sub>4</sub>: 2394.87; Found: 1047.8 [**1**+(OTf)<sub>2</sub>]<sup>2+</sup>, 649.5 [**1**+(OTf)]<sup>3+</sup>, 449.4 **1**. (**1** = C<sub>100</sub>H<sub>80</sub>N<sub>8</sub>O<sub>12</sub>Pd<sub>2</sub> = [Pd<sub>2</sub>L<sub>4</sub>]<sup>4+</sup>).

### Synthesis of **1**(*d*-camS)<sub>4</sub>

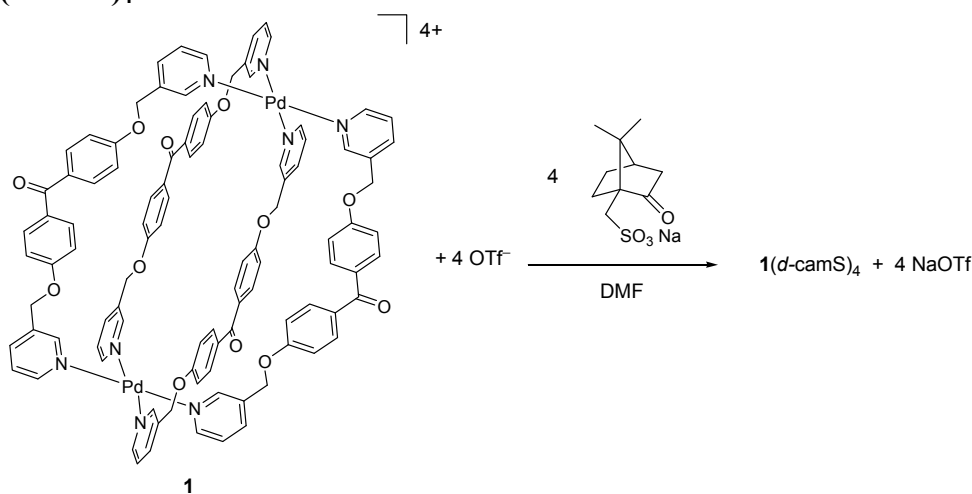

Sodium *d*-camphorsulfonate (13.7 mg,  $5.40 \times 10^{-2}$  mmol) was added to **1**(OTf)<sub>4</sub> (32.3 mg,  $1.35 \times 10^{-2}$  mmol) at room temperature in DMF (2 mL). Upon addition, the mixture was stirred at 60 °C for 1.5 h, after which white precipitate was isolated by filtration and washed several times with small quantities of distilled water and dried in vacuo to give **1**(*d*-camS)<sub>4</sub> in 75 % yield (27.4 mg,  $1.01 \times 10^{-2}$  mmol).

## Synthesis of **1**(*l*-camS)<sub>4</sub>

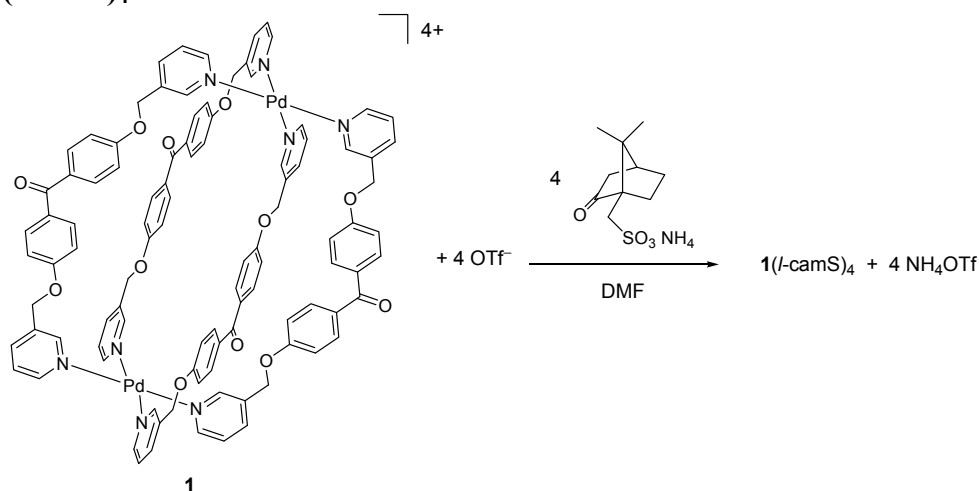

Ammonium *l*-camphorsulfonate (13.1 mg,  $5.27 \times 10^{-2}$  mmol) was added to **1**(OTf)<sub>4</sub> (31.5 mg,  $1.31 \times 10^{-2}$  mmol) at room temperature in DMF (2 mL). Upon addition, the mixture was stirred at 60 °C for 1.5 h, after which white precipitate was isolated by filtration and washed several times with small quantities of distilled water and dried in vacuo to give **1**(*l*-camS)<sub>4</sub> in 68 % yield (24.1 mg,  $8.9 \times 10^{-3}$  mmol).

## Synthesis of Na(DenS)

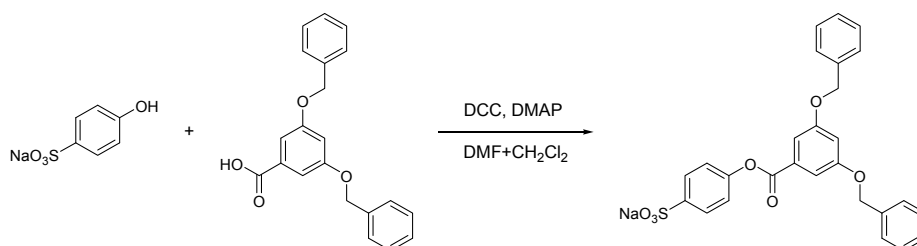

Sodium *p*-hydroxybenzenesulfonate (0.18 g,  $7.7 \times 10^{-1}$  mmol) in dry DMF (5 mL) was added slowly to 3,5-bis(benzyloxy)benzoic acid (0.26 g,  $7.8 \times 10^{-1}$  mmol)<sup>7</sup> and *N,N'*-dicyclohexylcarbodiimide (0.16 g,  $7.7 \times 10^{-1}$  mmol) at 0 °C in dry CH<sub>2</sub>Cl<sub>2</sub> (10 mL). The solution was stirred at rt for 22 h and concentrated under reduced pressure to give the crude product. The crude product was purified by column chromatography using silica gel (CH<sub>2</sub>Cl<sub>2</sub>:MeOH = 9:1, v/v) to give a white powder. Repeated crystallization from methanol-CH<sub>2</sub>Cl<sub>2</sub> mixed solvent solutions gave colourless crystals of Na(DenS)(H<sub>2</sub>O)<sub>1.5</sub> in 30 % yield (0.12 g,  $2.26 \times 10^{-1}$  mmol). <sup>1</sup>H NMR (500 MHz, DMSO-*d*<sub>6</sub>, rt):  $\delta$  7.66 (d,  $J = 5.8$  Hz, 2H), 7.46 (d,  $J = 8.5$  Hz, 4H), 7.39 (t,  $J = 7.3$  Hz, 4H), 7.33 (m, 4H), 7.20 (d,  $J = 8.5$  Hz, 2H), 7.04 (t,  $J = 2.1$  Hz, 1H), 5.19 (s, 4H); <sup>13</sup>C NMR (125 MHz, DMSO-*d*<sub>6</sub>):  $\delta$  164.01, 159.44, 150.37, 145.78, 136.45, 130.65, 128.05, 127.84, 127.63, 127.27, 126.84, 121.05, 108.40, 69.64; Elemental Analysis calcd. for C<sub>27</sub>H<sub>21</sub>O<sub>7</sub>S Na(H<sub>2</sub>O)<sub>1.5</sub>: C, 60.10; H, 4.48; Found: C, 60.17; H, 4.66; Melting Point: > 300 °C (decomp.).

## Supporting Figures

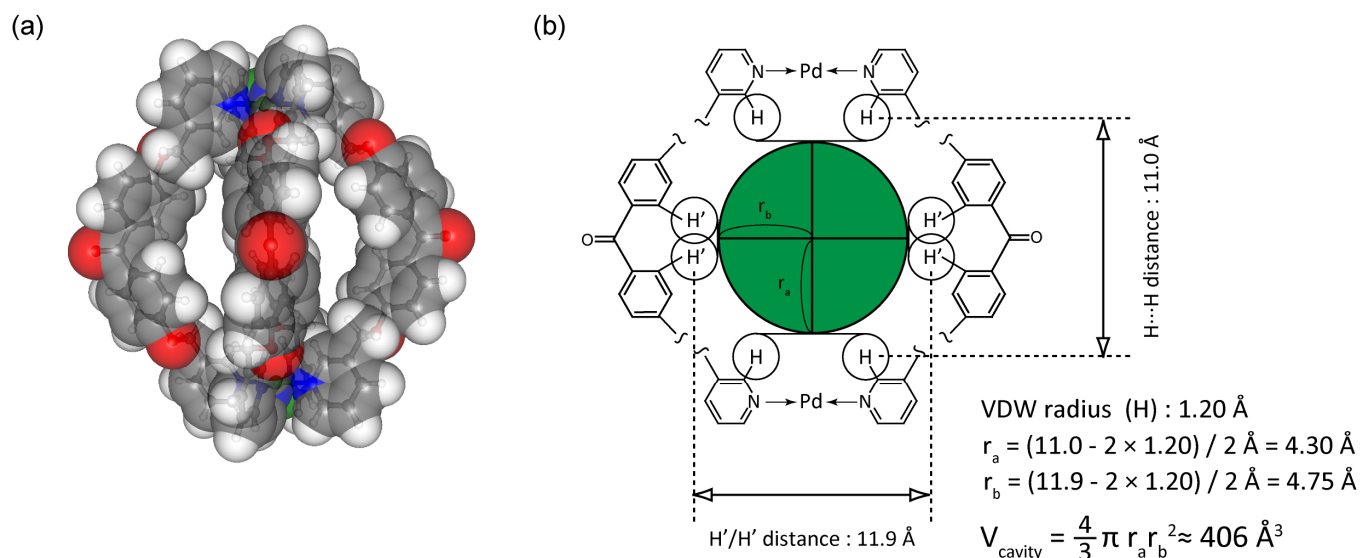

**Fig. S1** (a) An energy minimized structure (universal force field method) of **1**.<sup>6,8</sup> Colour scheme: gray (carbon), white (hydrogen), blue (nitrogen), red (oxygen), green (palladium). (b) Cavity volume of **1**.

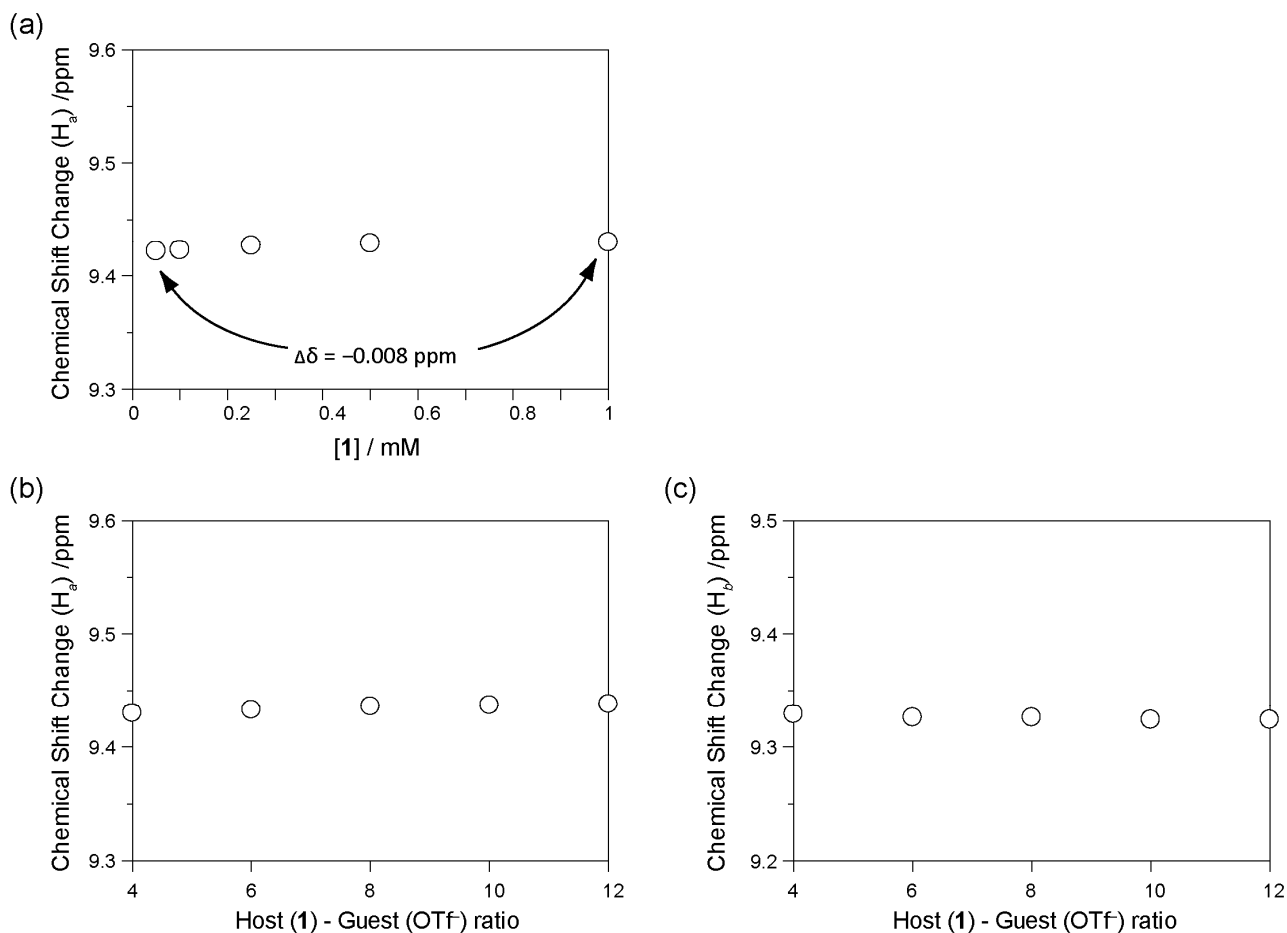

**Fig. S2** (a) Chemical shift change of  $H_a$  upon dilution ( $[1]_{\text{start}} = 1.0 \text{ mM}$ ,  $[\text{OTf}^-]_{\text{start}} = 4.0 \text{ mM}$ ). (b) and (c) NMR titrations ( $\text{OTf}^-$ ) monitoring  $H_a$  and  $H_b$ , respectively.  $[1] = 1.0 \text{ mM}$ .

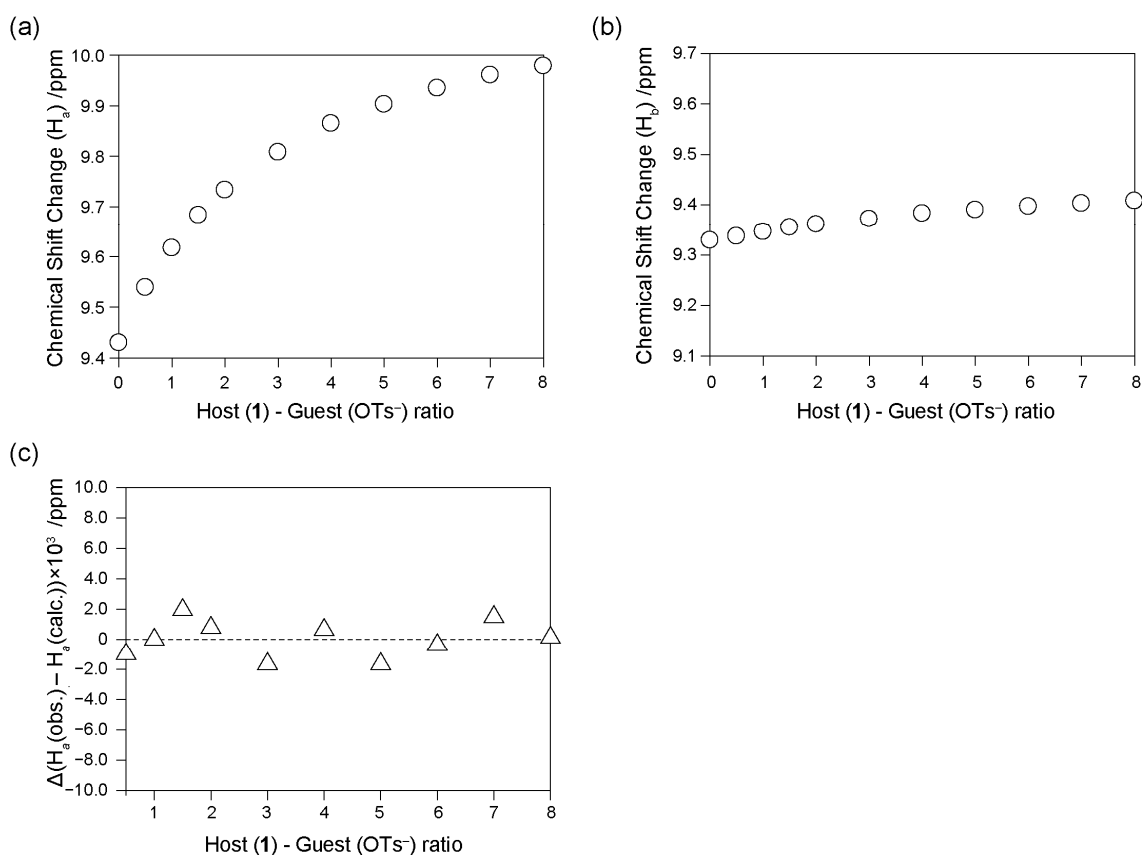

**Fig. S3** <sup>1</sup>H NMR titration (OTs<sup>-</sup>) monitoring (a)  $H_a$  and (b)  $H_b$ . [1] = 1.0 mM. (c)  $H_a(\text{obs.}) - H_a(\text{calc.})$ .  $H_a(\text{calc.})$  were calculated using WinEQNMR2 program<sup>5</sup> (see also p. S20).

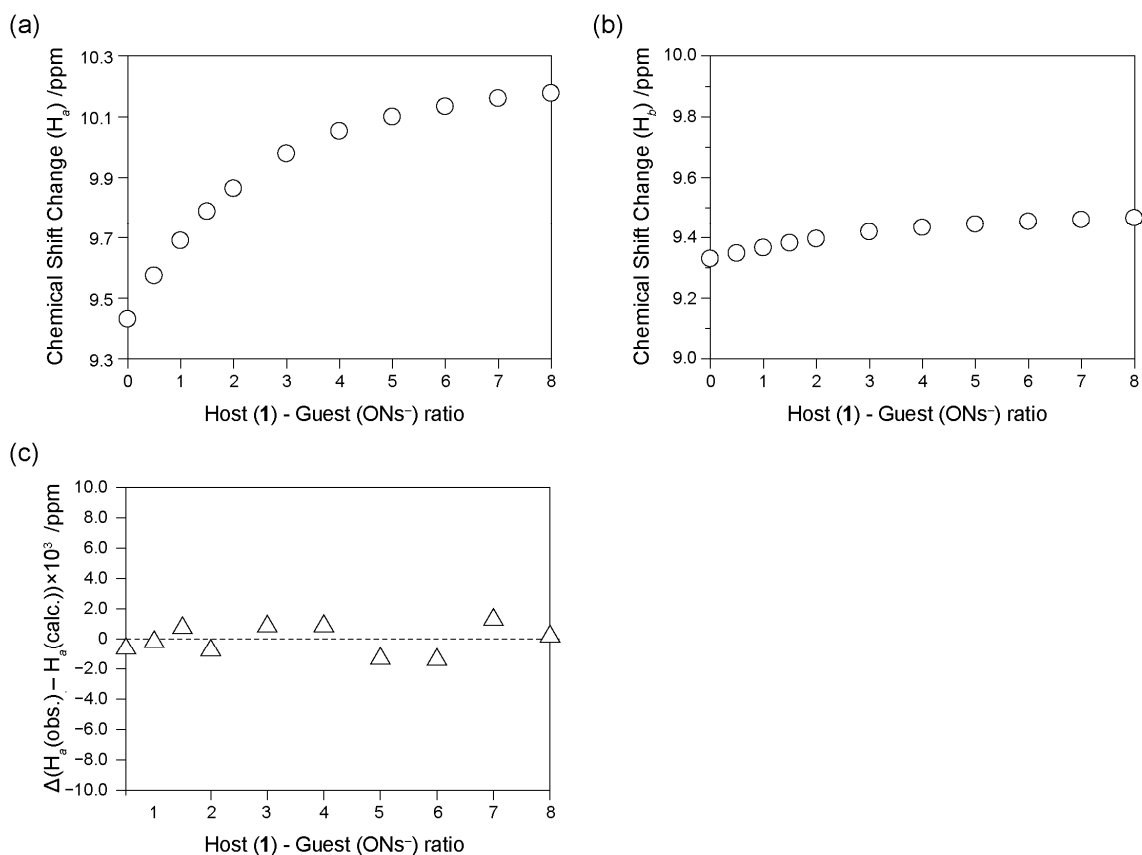

**Fig. S4** <sup>1</sup>H NMR titration (ONs<sup>-</sup>) monitoring (a)  $H_a$  and (b)  $H_b$ . [1] = 1.0 mM. (c)  $H_a(\text{obs.}) - H_a(\text{calc.})$ .  $H_a(\text{calc.})$  were calculated using WinEQNMR2 program<sup>5</sup> (see also p. S21).



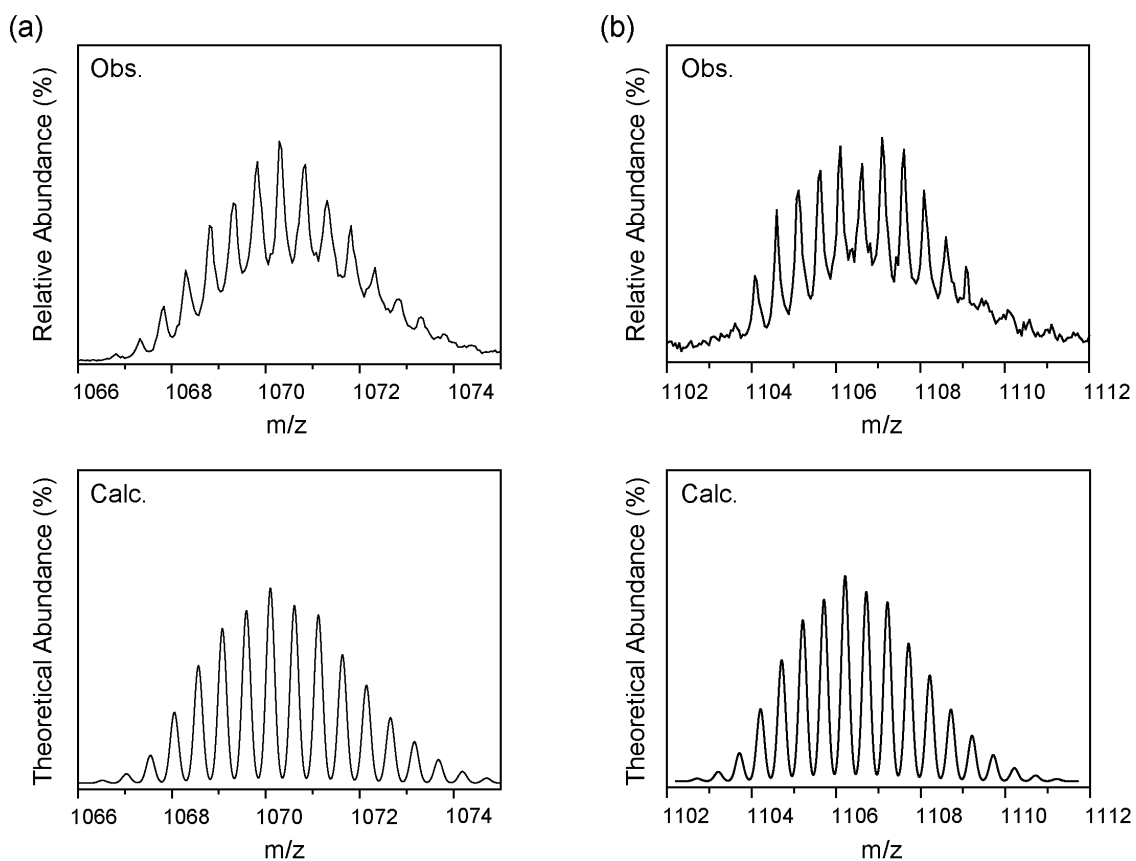

**Fig. S5** Observed and calculated ion peaks of (a)  $[1+(OTs)_2]^{2+}$  and (b)  $[1+(ONs)_2]^{2+}$ .

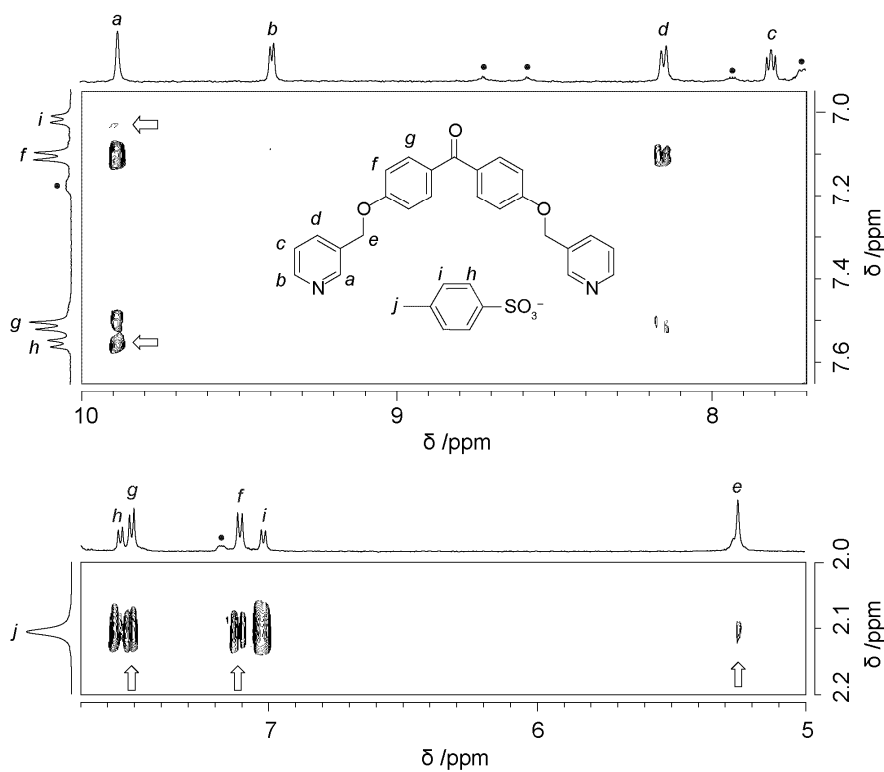

**Fig. S6** Partial views of the 2D NOESY spectrum (500 MHz,  $DMSO-d_6$ , rt) of **1** with 4 equiv  $OTs^-$ . Mixing time = 1000 ms. The arrows denote NOEs.

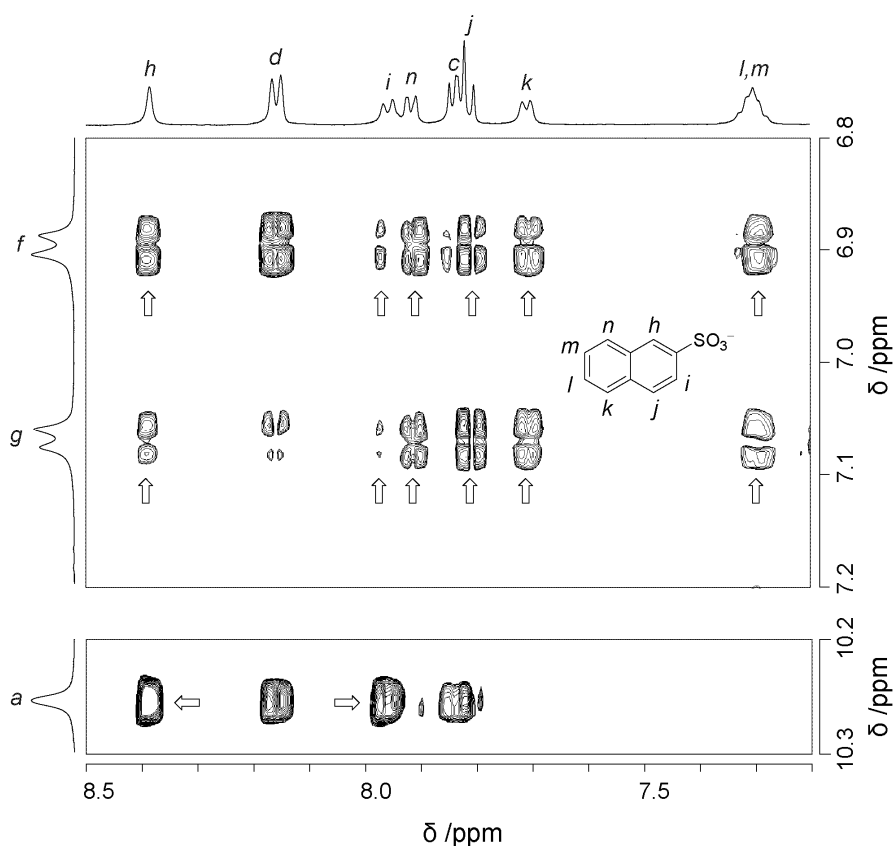

**Fig. S7** Partial views of the 2D NOESY spectrum (500 MHz, DMSO-*d*<sub>6</sub>, rt) of **1** with 4 equiv ONs<sup>-</sup>. Mixing time = 1000 ms. The arrows denote NOEs.

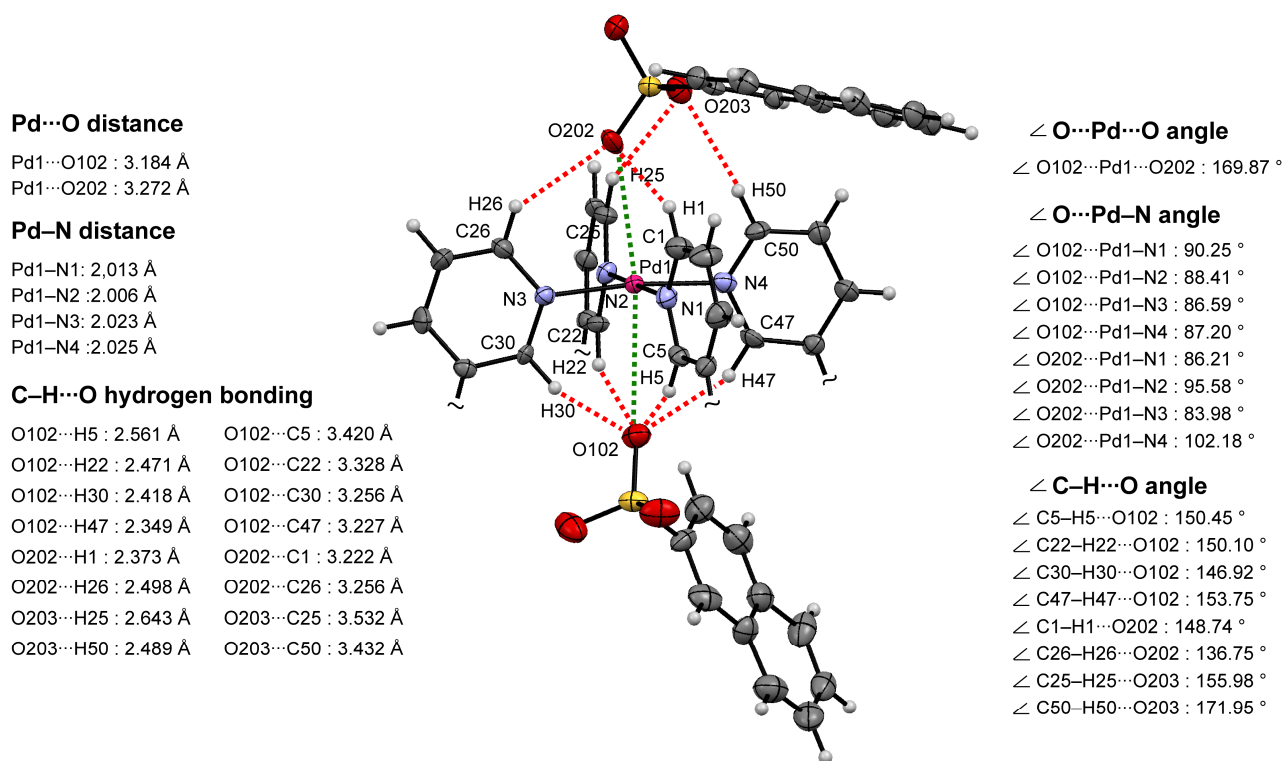

**Fig. S8** Coordination environment around the Pd<sup>2+</sup> centre of **1D**(ONs)<sub>2</sub> with atomic numbering scheme. Red dotted lines denote C-H...O hydrogen bonding. Colour scheme: gray (carbon), white (hydrogen), light blue (nitrogen), red (oxygen), orange (sulphur), purple (palladium).

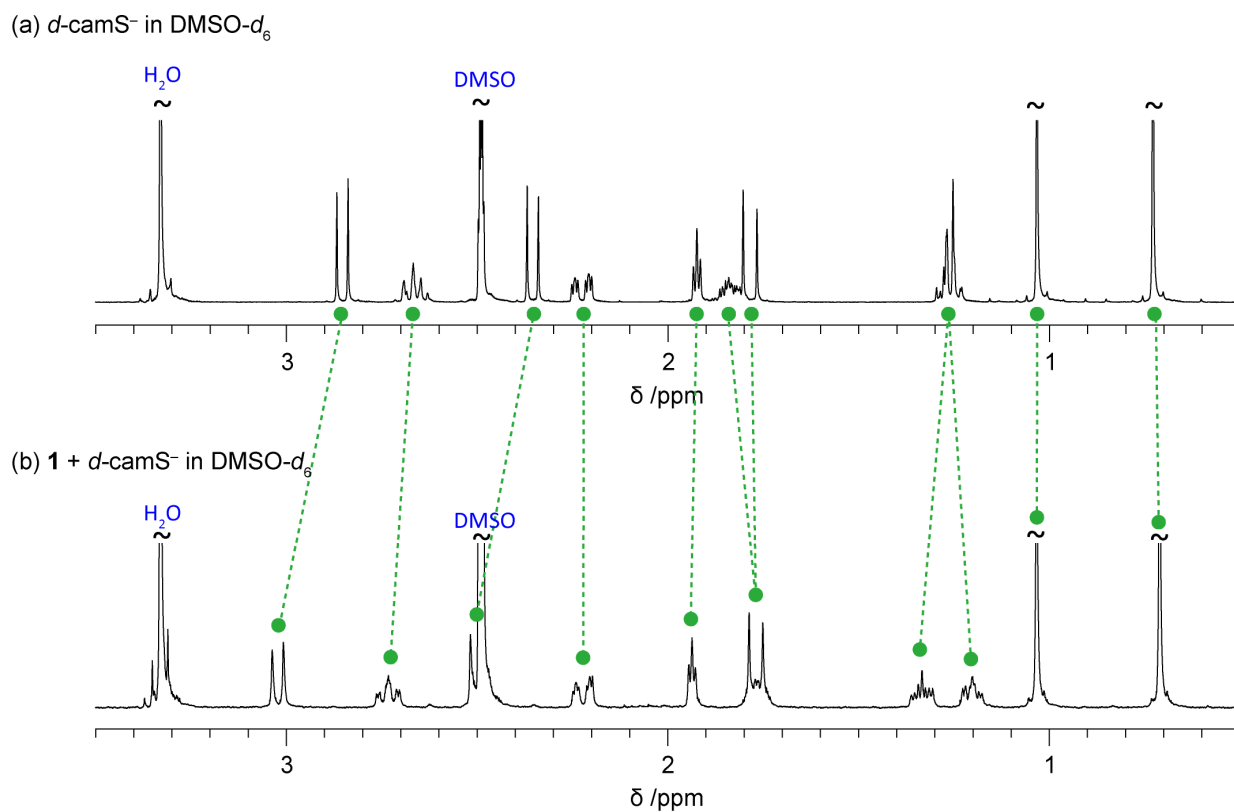

**Fig. S9** Chemical shift change of  $d\text{-camS}^-$  upon host-guest complexation (500 MHz,  $\text{DMSO-}d_6$ , rt). (a)  $d\text{-camS}^-$ . (b) **1** +  $d\text{-camS}^-$  ( $[\mathbf{1}] = 1.25 \text{ mM}$ ,  $[d\text{-camS}^-] = 5.0 \text{ mM}$ ).

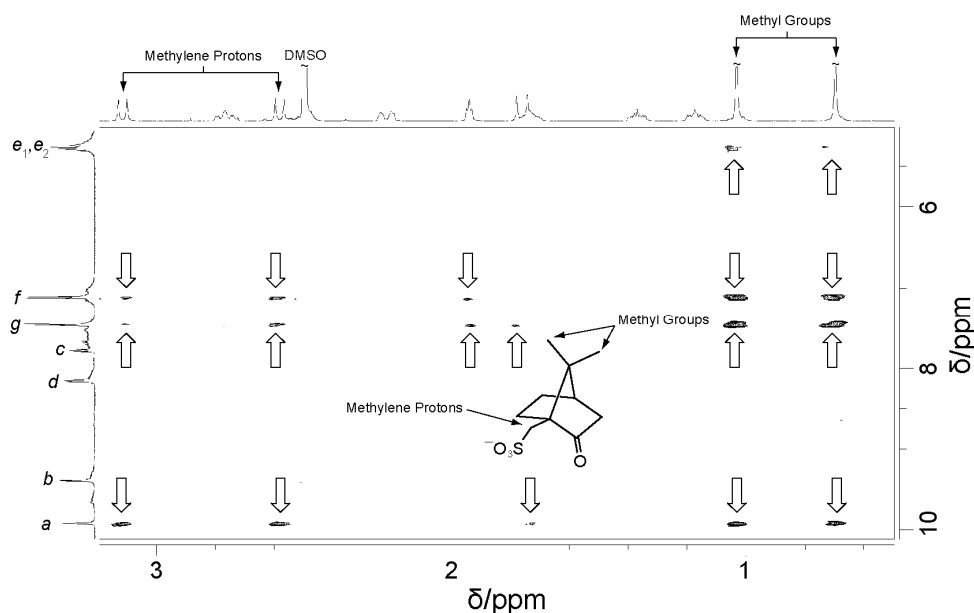

**Fig. S10** A partial view of the 2D NOESY NMR spectrum (500 MHz,  $\text{DMSO-}d_6$ , rt) of **1** with 4 equiv  $d\text{-camS}^-$ . ( $[\mathbf{1}] = 2.5 \text{ mM}$  and  $[d\text{-camS}^-] = 10.0 \text{ mM}$ ). Mixing time = 1000 ms.

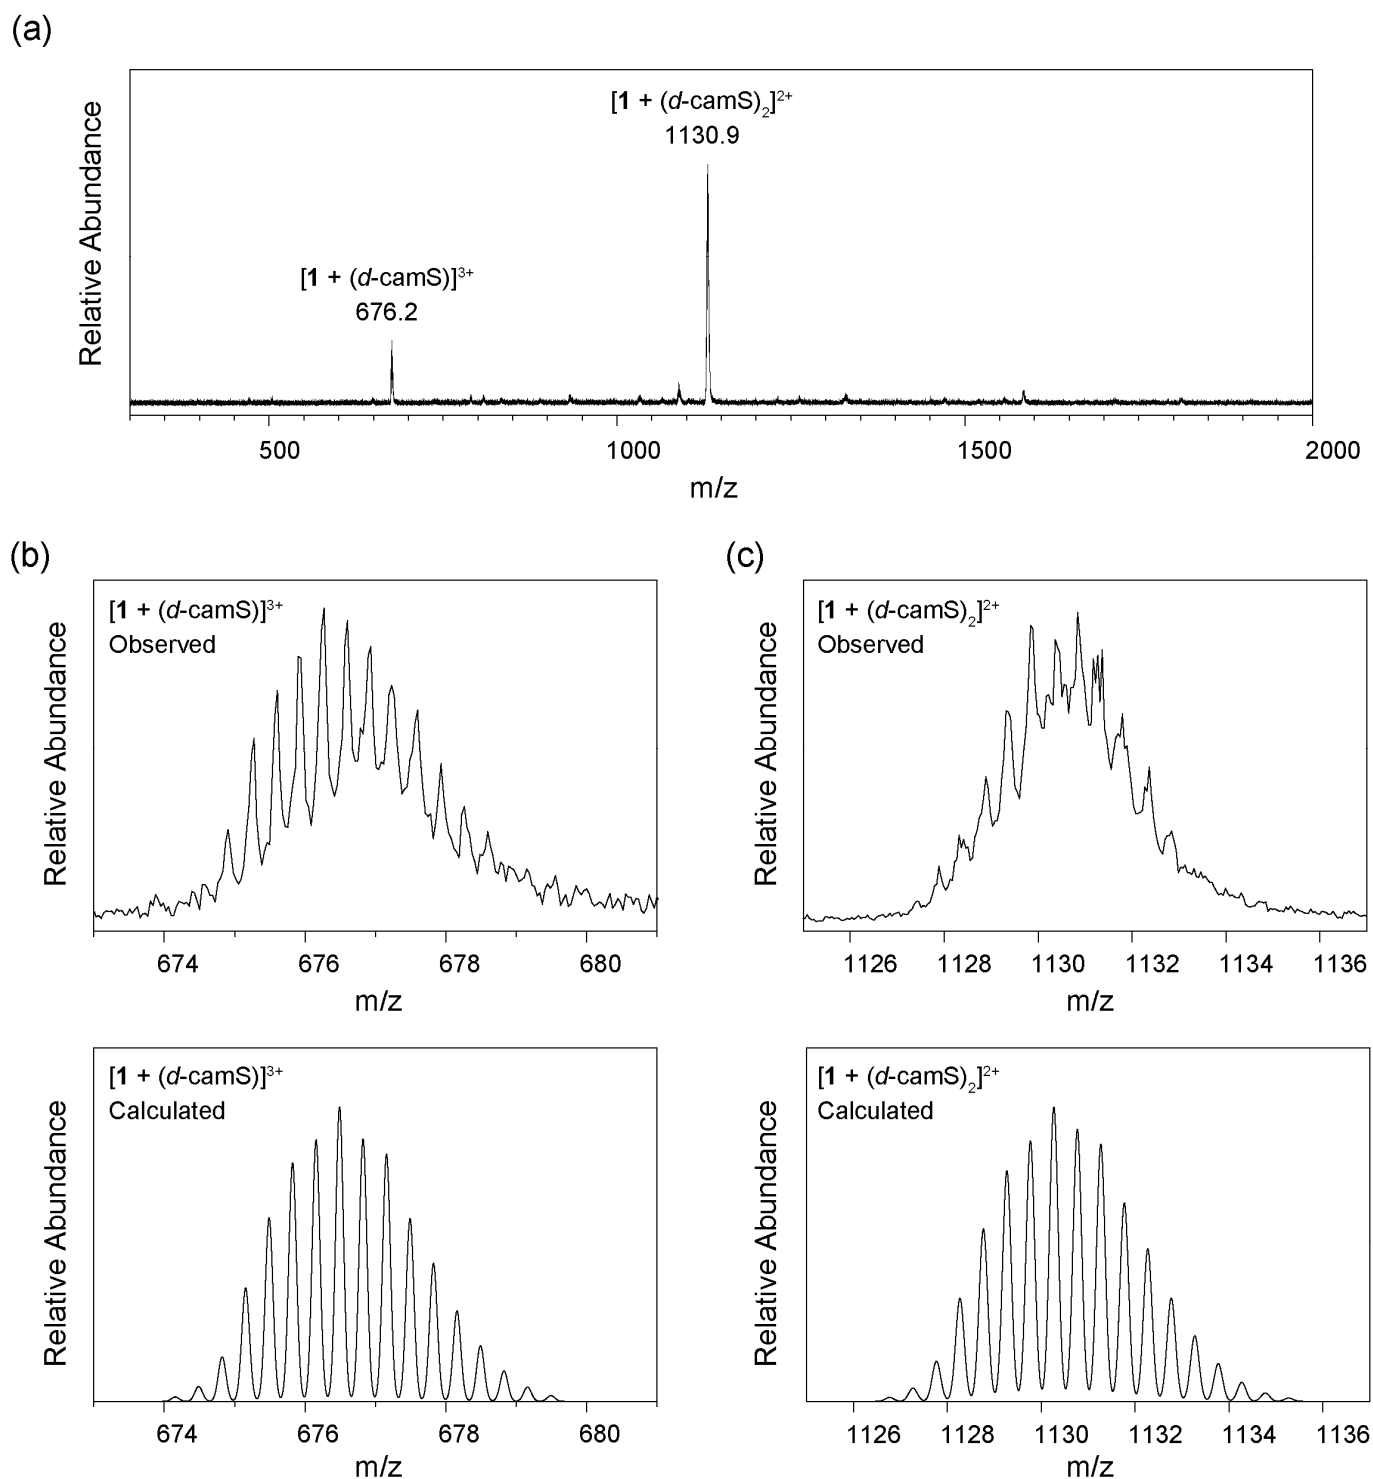

**Fig. S11** (a) ESI MS spectrum of the DMSO- $d_6$  solution containing  $\mathbf{1}_{\text{major}} \rightarrow (d\text{-cam})_2$  and  $\mathbf{1}_{\text{minor}} \rightarrow (d\text{-cam})_2$  (See also Fig. 1d). (b) and (c) Observed and calculated ion peaks of  $[1 + (d\text{-camS})]^{3+}$  and  $[1 + (d\text{-camS})_2]^{2+}$ , respectively.

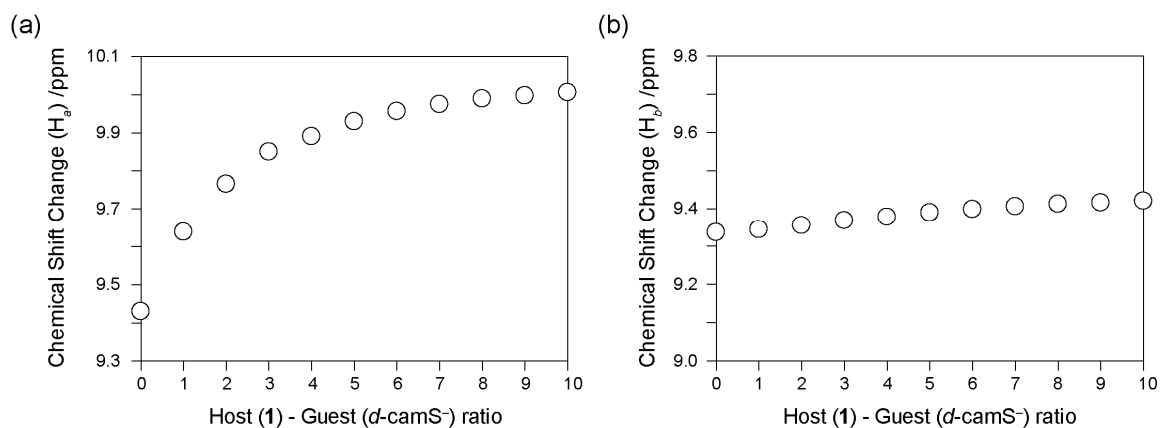

**Fig. S12**  $^1\text{H}$  NMR titration ( $d$ -camS $^-$ ) monitoring (a)  $H_a$  and (b)  $H_b$ . [ $\mathbf{1}$ ] = 2.5 mM.

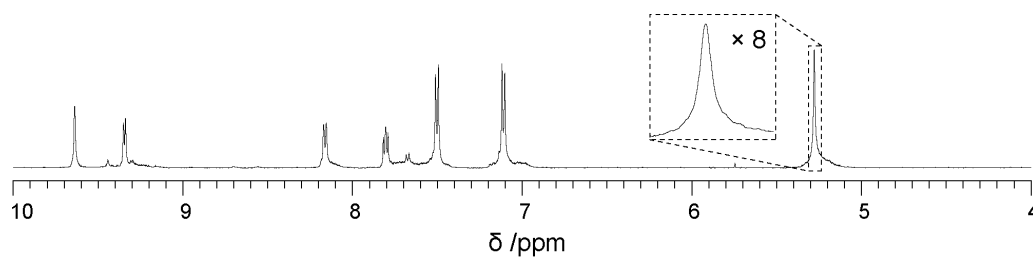

**Fig. S13**  $^1\text{H}$  NMR spectrum (500 MHz, DMSO- $d_6$ , rt) of  $\mathbf{1}$  with 1 equiv  $d$ -camS $^-$ . ([ $\mathbf{1}$ ] = 2.5 mM and [ $d$ -camS $^-$ ] = 2.5 mM).

#### Pd...O distance

Pd1...O102 : 3.038 Å  
 Pd1...O401 : 3.122 Å

#### Pd-N distance

Pd1-N1 : 2.023 Å  
 Pd1-N3 : 2.003 Å  
 Pd1-N5 : 2.023 Å  
 Pd1-N7 : 2.027 Å

#### C-H...O hydrogen bonding

|                      |                      |
|----------------------|----------------------|
| O102...H1 : 2.868 Å  | O102...C1 : 3.614 Å  |
| O102...H26 : 2.242 Å | O102...C26 : 3.075 Å |
| O102...H51 : 2.786 Å | O102...C51 : 3.469 Å |
| O102...H76 : 2.552 Å | O102...C76 : 3.364 Å |
| O401...H5 : 2.514 Å  | O401...C5 : 3.374 Å  |
| O401...H30 : 2.488 Å | O401...C30 : 3.264 Å |
| O401...H55 : 2.395 Å | O401...C55 : 3.174 Å |
| O401...H80 : 2.626 Å | O401...C80 : 3.463 Å |

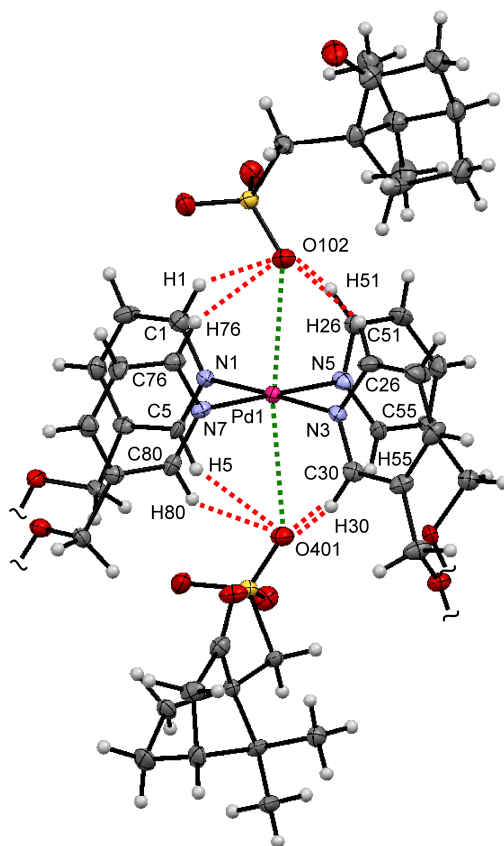

#### ∠ O...Pd...O angle

∠ O102...Pd1...O401 : 171.36 °

#### ∠ O...Pd-N angle

∠ O102...Pd1-N1 : 95.60 °  
 ∠ O102...Pd1-N3 : 85.92 °  
 ∠ O102...Pd1-N5 : 90.31 °  
 ∠ O102...Pd1-N7 : 91.05 °  
 ∠ O401...Pd1-N1 : 92.25 °  
 ∠ O401...Pd1-N3 : 86.35 °  
 ∠ O401...Pd1-N5 : 85.67 °  
 ∠ O401...Pd1-N7 : 93.20 °

#### ∠ C-H...O angle

∠ C1-H1...O102 : 136.18 °  
 ∠ C26-H26...O102 : 145.78 °  
 ∠ C51-H51...O102 : 129.55 °  
 ∠ C76-H76...O102 : 143.79 °  
 ∠ C5-H5...O401 : 150.64 °  
 ∠ C30-H30...O401 : 138.79 °  
 ∠ C55-H55...O401 : 139.06 °  
 ∠ C80-H80...O401 : 147.17 °

#### Pd...O distance

Pd2...O302 : 3.039 Å  
 Pd2...O202 : 3.214 Å

#### Pd-N distance

Pd1-N2 : 2.034 Å  
 Pd1-N4 : 2.020 Å  
 Pd1-N6 : 2.030 Å  
 Pd1-N8 : 2.027 Å

#### C-H...O hydrogen bonding

|                       |                       |
|-----------------------|-----------------------|
| O302...H23 : 2.229 Å  | O302...C23 : 3.100 Å  |
| O302...H50 : 2.716 Å  | O302...C50 : 3.483 Å  |
| O302...H75 : 2.485 Å  | O302...C75 : 3.301 Å  |
| O302...H100 : 2.596 Å | O302...C100 : 3.328 Å |
| O202...H22 : 2.433 Å  | O202...C22 : 3.274 Å  |
| O202...H47 : 2.633 Å  | O202...C47 : 3.500 Å  |
| O202...H71 : 2.616 Å  | O202...C71 : 3.451 Å  |
| O202...H97 : 2.637 Å  | O202...C97 : 3.438 Å  |

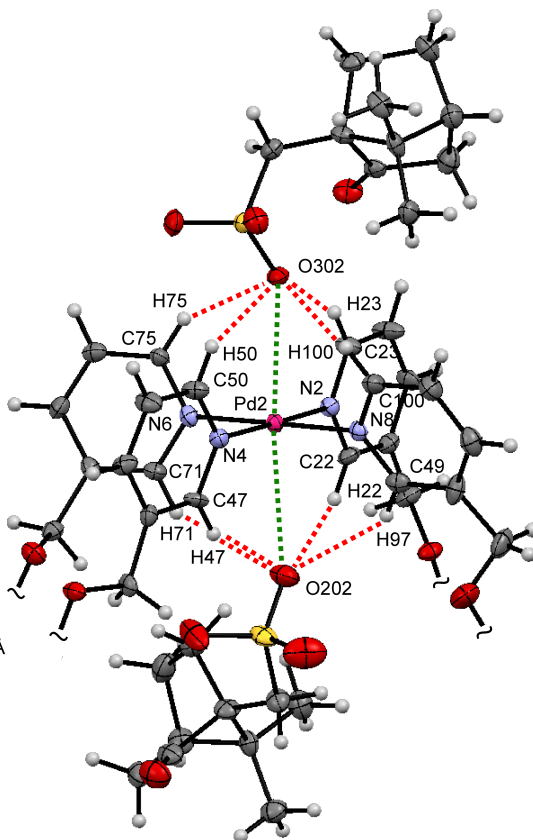

#### ∠ O...Pd...O angle

∠ O202...Pd2...O120 : 173.08 °

#### ∠ O...Pd-N angle

∠ O302...Pd2-N2 : 87.13 °  
 ∠ O302...Pd2-N4 : 92.38 °  
 ∠ O302...Pd2-N6 : 91.04 °  
 ∠ O302...Pd2-N8 : 89.01 °  
 ∠ O202...Pd2-N2 : 86.04 °  
 ∠ O202...Pd2-N4 : 94.46 °  
 ∠ O202...Pd2-N6 : 90.52 °  
 ∠ O202...Pd2-N8 : 89.77 °

#### ∠ C-H...O angle

∠ C23-H23...O302 : 152.29 °  
 ∠ C50-H50...O302 : 138.21 °  
 ∠ C75-H75...O302 : 143.97 °  
 ∠ C100-H100...O302 : 133.99 °  
 ∠ C22-H22...O202 : 147.48 °  
 ∠ C47-H47...O202 : 151.92 °  
 ∠ C71-H71...O202 : 146.89 °  
 ∠ C97-H97...O202 : 142.33 °

**Fig. S14** Coordination environments around the Pd<sup>2+</sup> centres of 1D(*d*-camS)<sub>2</sub> with atomic numbering scheme. Red dotted lines denote C-H...O hydrogen bonding. Colour scheme: gray (carbon), white (hydrogen), light blue (nitrogen), red (oxygen), orange (sulphur), purple (palladium).

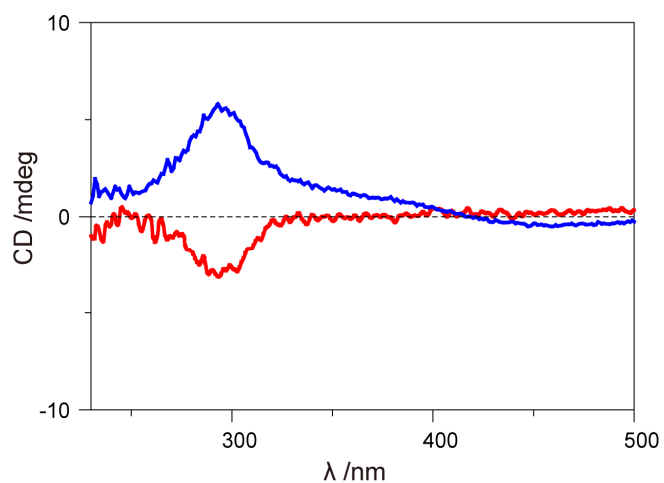

**Fig. S15** Solid-state transmittance spectra (KBr disk) of **1**(*d*-camS)<sub>4</sub> (blue line) and **1**(*l*-camS)<sub>4</sub> (red line). Positive and negative CD originate from *d*-camS<sup>-</sup> and *l*-camS<sup>-</sup>, respectively.

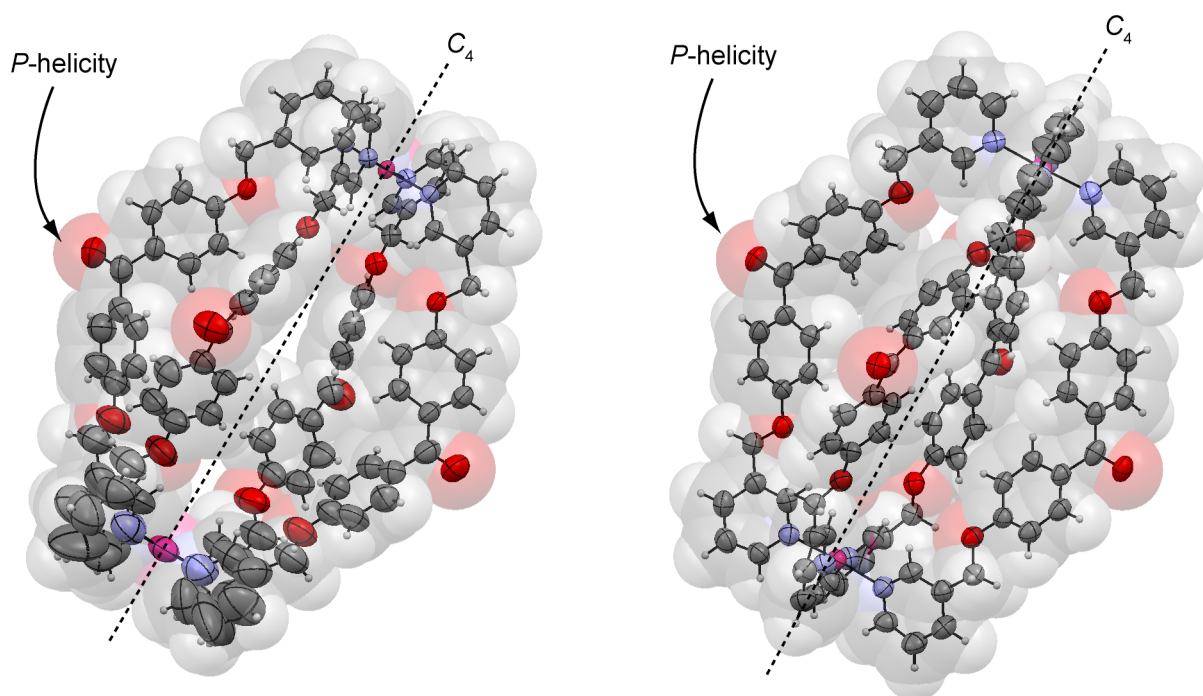

**Fig. S16** ORTEP drawing (50 % probability ellipsoids) of the X-ray crystal structures of receptors **1** with *P*-form (both receptors are the components of an interlocked metallohelicate with *P*-form).<sup>6</sup> The benzophenone cores possess *P*-helicity. Colour scheme: gray (carbon), white (hydrogen), blue (nitrogen), red (oxygen), purple (palladium).

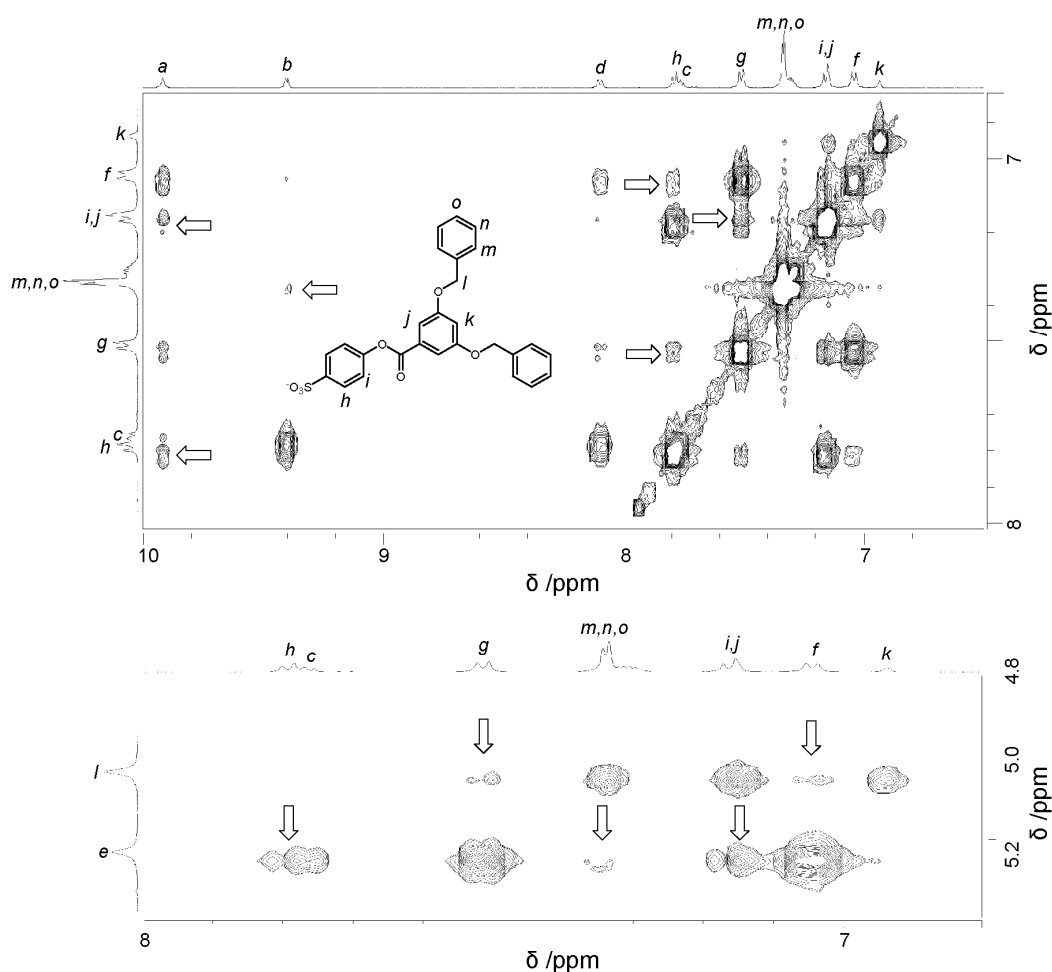

**Fig. S17** Partial views of the 2D NOESY spectrum (500 MHz, DMSO- $d_6$ , rt) of **1** with 4 equiv DenS $^-$ . ([**1**] = 2.5 mM and [DenS $^-$ ] = 10.0 mM). Mixing time = 1000 ms.

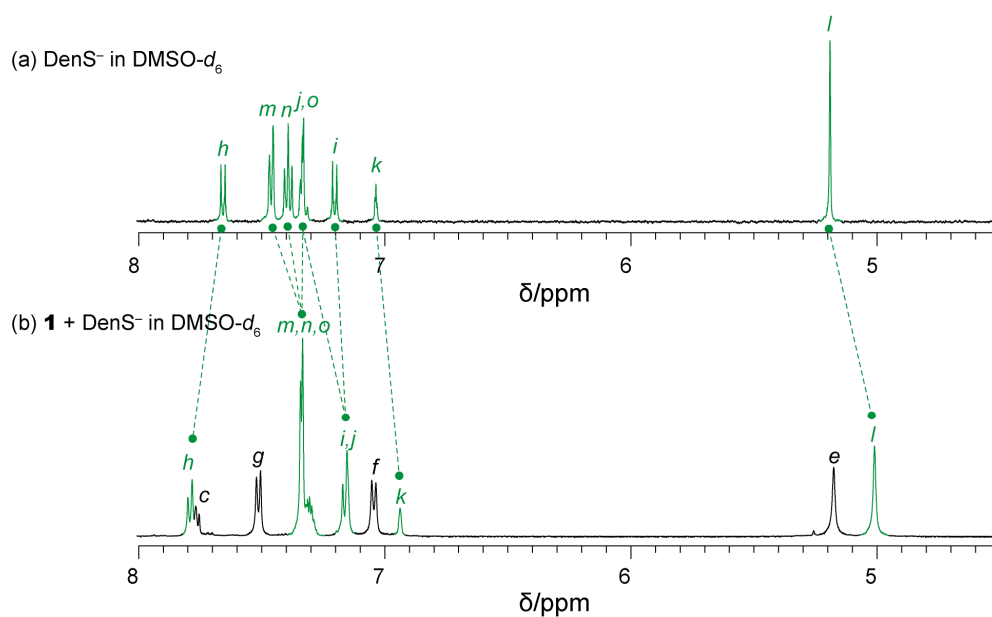

**Fig. S18** Chemical shift change of the signals of *d*-camS $^-$  upon host-guest complexation. (a) DenS $^-$ . (b) **1** + DenS $^-$  ([**1**] = 2.5 mM, [DenS $^-$ ] = 10.0 mM).



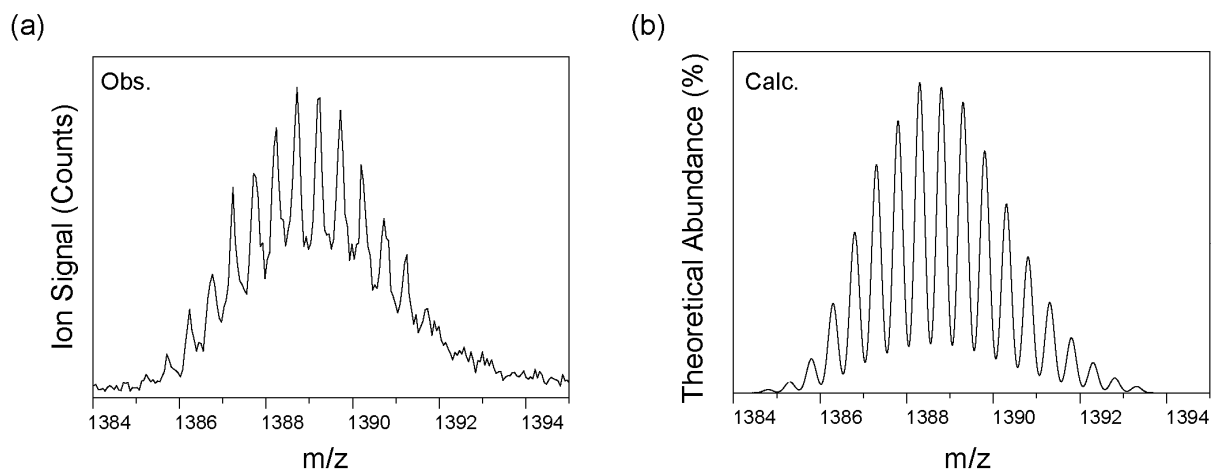

**Fig. S19** (a) Observed and (b) calculated ion peaks of  $[1+(\text{DenS})_2]^{2+}$ .

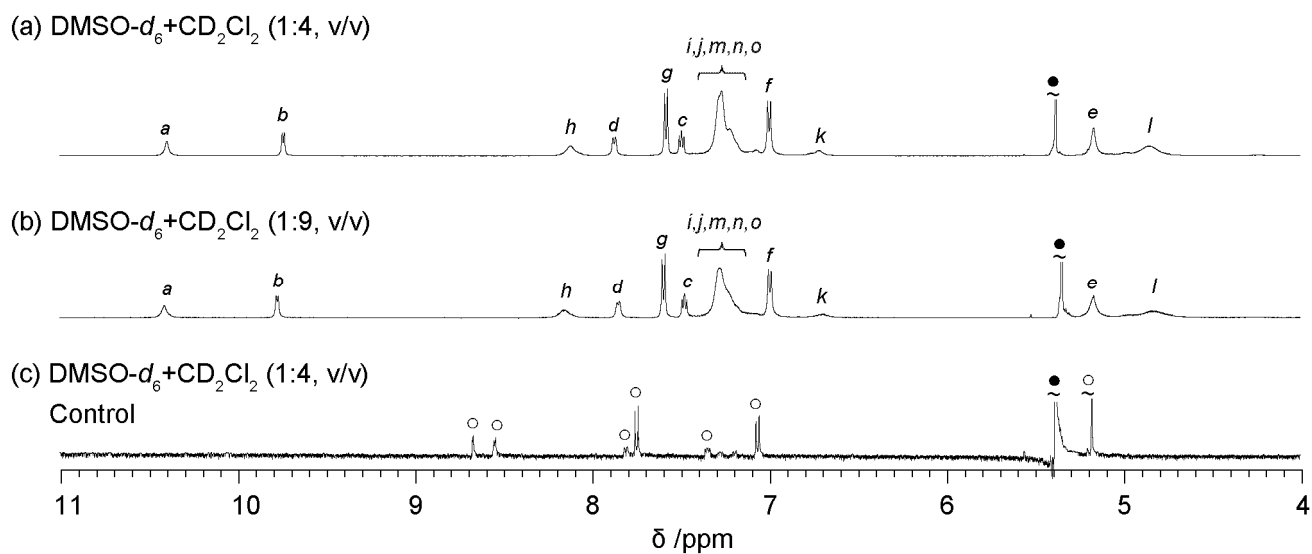

**Fig. S20** (a), (b) <sup>1</sup>H NMR spectra (500 MHz, DMSO-*d*<sub>6</sub>+CD<sub>2</sub>Cl<sub>2</sub>, rt) of **1** with 4 equiv DenS<sup>-</sup>. The chemical shifts are with respect to DMSO (δ = 2.48 ppm). (c) <sup>1</sup>H NMR spectrum (500 MHz, DMSO-*d*<sub>6</sub>+CD<sub>2</sub>Cl<sub>2</sub>, rt) of the suspended solution of **1**(OTf)<sub>4</sub>. Noise reduction was applied to the spectrum. (●) and (○) denote partially deuterated dichloromethane and free **L**, respectively.<sup>9</sup>

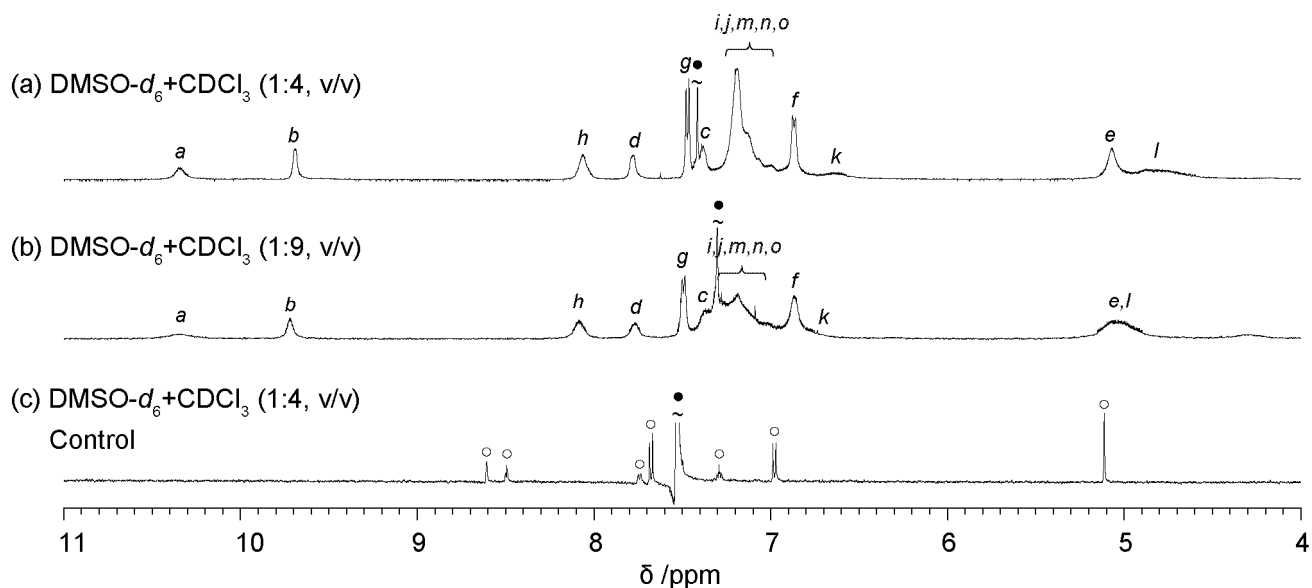

**Fig. S21** (a), (b)  $^1\text{H}$  NMR spectra (500 MHz, DMSO- $d_6$ +CDCl $_3$ , rt) of **1** with 4 equiv DenS $^-$ . The chemical shifts are with respect to DMSO ( $\delta = 2.48$  ppm). (c)  $^1\text{H}$  NMR spectrum (500 MHz, DMSO- $d_6$ +CDCl $_3$ , rt) of the suspended solution of **1**(OTf) $_4$ . Noise reduction was applied to the spectrum. (●) and (○) denote partially deuterated chloroform and free **L**, respectively.<sup>9</sup>

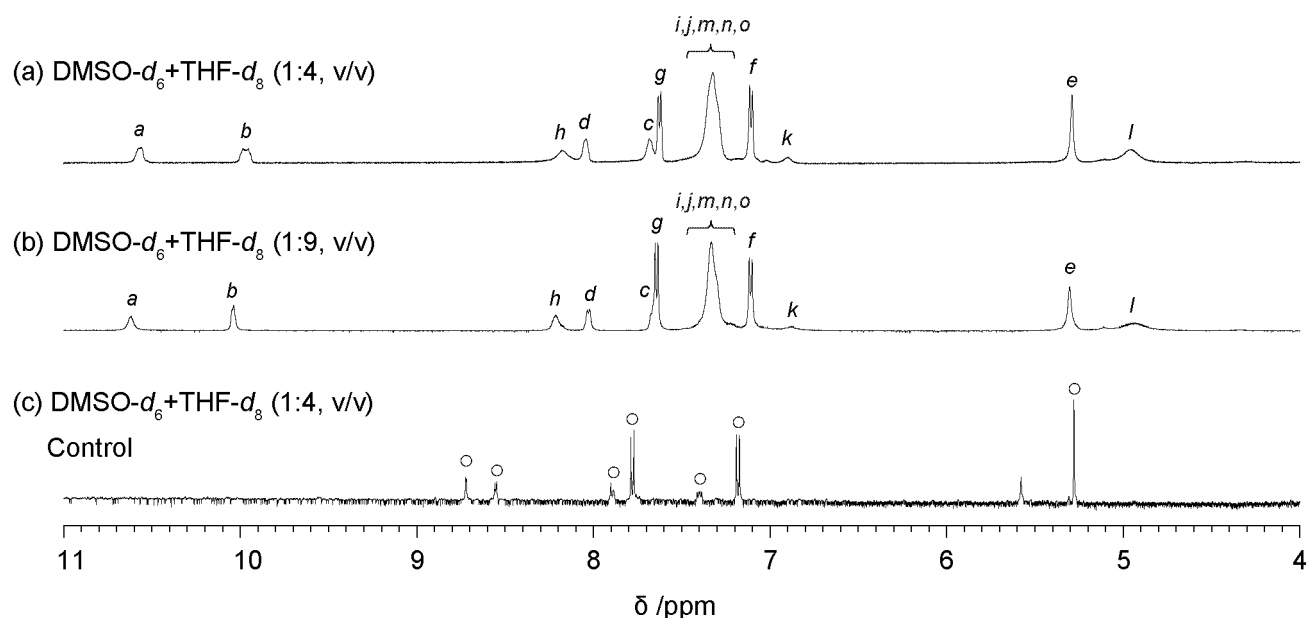

**Fig. S22** (a), (b)  $^1\text{H}$  NMR spectra (500 MHz, DMSO- $d_6$ +THF- $d_8$ , rt) of **1** with 4 equiv DenS $^-$ . The chemical shifts are with respect to DMSO ( $\delta = 2.48$  ppm). (c)  $^1\text{H}$  NMR spectrum (500 MHz, DMSO- $d_6$ +THF- $d_8$ , rt) of the suspended solution of **1**(OTf) $_4$ . Noise reduction was applied to the spectrum. (○) denotes free **L**.<sup>9</sup>

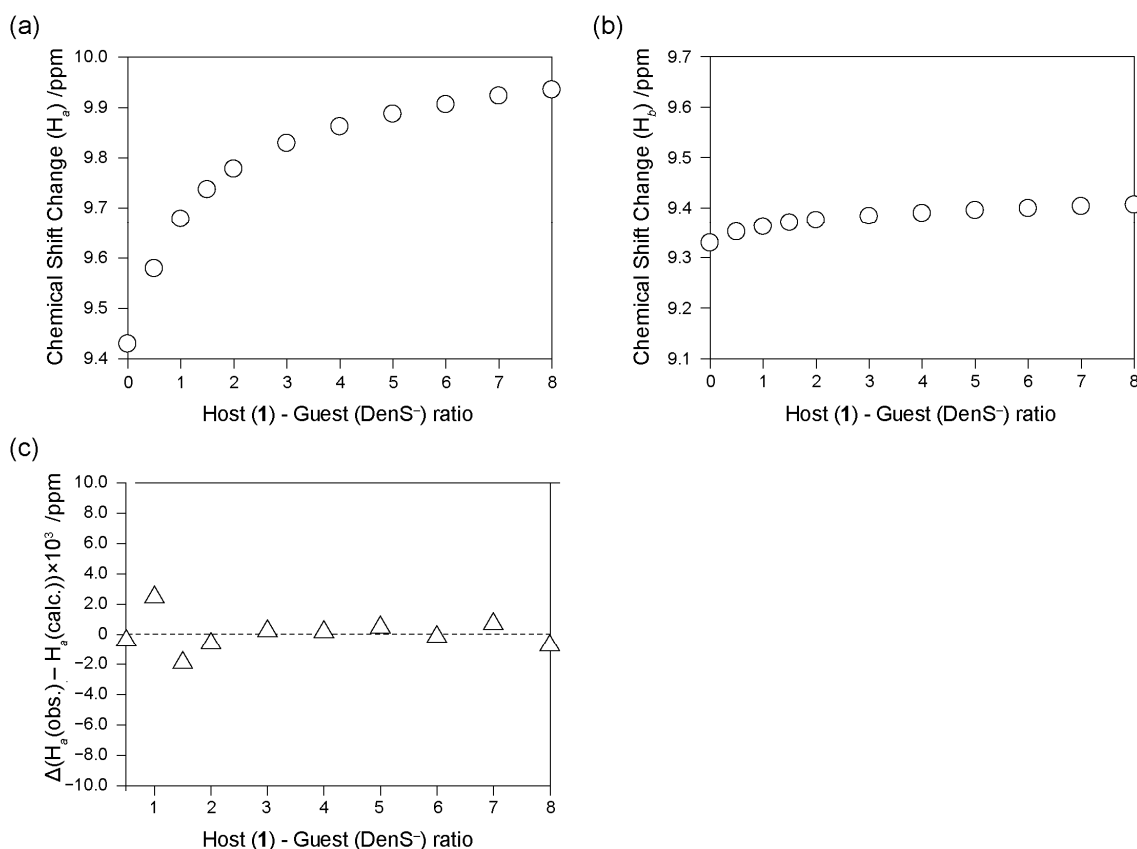

**Fig. S23** <sup>1</sup>H NMR titration (DenS<sup>-</sup>) monitoring (a)  $H_a$  and (b)  $H_b$ . [**1**] = 1.0 mM. (c)  $H_a(\text{obs.}) - H_a(\text{calc.})$ .  $H_a(\text{calc.})$  were calculated using WinEQNMR2 program<sup>5</sup> (see also p. S22).

**Table S2** Association constants  $\log_{10}(K_{a1})$  and  $\log_{10}(K_a)$  in DMSO-*d*<sub>6</sub>.

| Anion             | $\log_{10}(K_{a1})$ | $\log_{10}(K_a)$ |
|-------------------|---------------------|------------------|
| OTs <sup>-</sup>  | 2.9(3)              | 5.1(5)           |
| ONs <sup>-</sup>  | 3.01(10)            | 5.57(14)         |
| DenS <sup>-</sup> | 3.7(2)              | 5.9(4)           |

$$K_{a1} = [\mathbf{1} \supset (\text{X})] / ([\mathbf{1}] \cdot [\text{X}]) \text{ and } K_a = [\mathbf{1} \supset (\text{X})_2] / ([\mathbf{1}] \cdot [\text{X}]^2)$$

## Data fitting of the NMR titrations ( $1 + OTs^-$ )<sup>5</sup>

Calculations by WinEQNMR2 Version 2.00 by Michael J. Hynes

Program run at 19:25:21 on 12/03/2010

Reactions:  $M + L = ML$  ( $\beta_1 = K_1$ );  $M + 2L = (ML)_2$  ( $\beta_2 = K_1K_2$ )

Data 2010 05 14

==== Anion Recognition ====

Equilibrium constants are  $\log_{10}$  values

NO. A PARAMETER DELTA ERROR CONDITION DESCRIPTION

|   |   |             |           |           |           |                          |
|---|---|-------------|-----------|-----------|-----------|--------------------------|
| 1 | 1 | 2.93323E+00 | 1.000E-01 | 2.580E-01 | 2.496E+03 | Stability constant(K1)   |
| 2 | 1 | 5.12105E+00 | 1.000E-01 | 5.104E-01 | 1.401E+04 | Stability constant(K1K2) |
| 3 | 1 | 9.44643E+00 | 1.000E-06 | 2.168E-03 | 5.890E+00 | Shift of 1               |
| 4 | 1 | 9.89682E+00 | 1.000E-04 | 1.533E-01 | 1.823E+04 | Shift of 1:1_complex     |
| 5 | 1 | 1.01493E+01 | 1.000E-04 | 1.872E-02 | 9.554E+01 | Shift of 1:2_complex     |

ORMS ERROR = 1.65E-03 MAX ERROR = 1.95E-03 AT OBS.NO. 3

RESIDUALS SQUARED = 1.36E-05

RFACTOR = 0.0119 PERCENT

| NO. | A | EXPT.      | DEL        | CALC.       | DEL         | RESIDUAL   | % DEV      | WEIGHT     | Guest(OTs) | Host(1) | pH |
|-----|---|------------|------------|-------------|-------------|------------|------------|------------|------------|---------|----|
| 1   | 1 | 9.5390E+00 | 9.5400E+00 | -9.8324E-04 | -1.0308E-02 | 1.0000E+00 | 5.0000E-04 | 1.0000E-03 | 0.0000E+00 |         |    |
| 2   | 1 | 9.6170E+00 | 9.6170E+00 | 1.9073E-06  | 1.9833E-05  | 1.0000E+00 | 1.0000E-03 | 1.0000E-03 | 0.0000E+00 |         |    |
| 3   | 1 | 9.6830E+00 | 9.6810E+00 | 1.9512E-03  | 2.0151E-02  | 1.0000E+00 | 1.5000E-03 | 1.0000E-03 | 0.0000E+00 |         |    |
| 4   | 1 | 9.7330E+00 | 9.7322E+00 | 7.8106E-04  | 8.0249E-03  | 1.0000E+00 | 2.0000E-03 | 1.0000E-03 | 0.0000E+00 |         |    |
| 5   | 1 | 9.8080E+00 | 9.8096E+00 | -1.6432E-03 | -1.6753E-02 | 1.0000E+00 | 3.0000E-03 | 1.0000E-03 | 0.0000E+00 |         |    |
| 6   | 1 | 9.8650E+00 | 9.8644E+00 | 6.4468E-04  | 6.5351E-03  | 1.0000E+00 | 4.0000E-03 | 1.0000E-03 | 0.0000E+00 |         |    |
| 7   | 1 | 9.9030E+00 | 9.9047E+00 | -1.6518E-03 | -1.6679E-02 | 1.0000E+00 | 5.0000E-03 | 1.0000E-03 | 0.0000E+00 |         |    |
| 8   | 1 | 9.9350E+00 | 9.9354E+00 | -3.5954E-04 | -3.6189E-03 | 1.0000E+00 | 6.0000E-03 | 1.0000E-03 | 0.0000E+00 |         |    |
| 9   | 1 | 9.9610E+00 | 9.9595E+00 | 1.4944E-03  | 1.5003E-02  | 1.0000E+00 | 7.0000E-03 | 1.0000E-03 | 0.0000E+00 |         |    |
| 10  | 1 | 9.9790E+00 | 9.9789E+00 | 1.2302E-04  | 1.2328E-03  | 1.0000E+00 | 8.0000E-03 | 1.0000E-03 | 0.0000E+00 |         |    |

TOLERANCE ON SUM OF SQUARES 0.0100

TOLERANCE ON EIGEN VALUES 0.0001

CONVERGANCE AFTER 7 ITERATIONS

## Data fitting of the NMR titrations ( $1 + \text{ONs}^-$ )<sup>5</sup>

Calculations by WinEQNMR2 Version 2.00 by Michael J. Hynes

Program run at 19:54:43 on 12/03/2010

Reactions:  $M + L = ML$  ( $\beta_1 = K_1$ );  $M + 2L = (ML)_2$  ( $\beta_2 = K_1K_2$ )

Data 2010 05 14

==== Anion Recognition ====

Equilibrium constants are  $\log_{10}$  values

NO. A PARAMETER DELTA ERROR CONDITION DESCRIPTION

|   |   |             |           |           |           |                          |
|---|---|-------------|-----------|-----------|-----------|--------------------------|
| 1 | 1 | 3.00538E+00 | 1.000E-01 | 9.944E-02 | 7.556E+02 | Stability constant(K1)   |
| 2 | 1 | 5.56744E+00 | 1.000E-01 | 1.441E-01 | 2.460E+03 | Stability constant(K1K2) |
| 3 | 1 | 9.43506E+00 | 1.000E-06 | 2.356E-03 | 8.241E+00 | Shift of 1               |
| 4 | 1 | 1.00402E+01 | 1.000E-04 | 7.674E-02 | 4.693E+03 | Shift of 1:1_complex     |
| 5 | 1 | 1.02835E+01 | 1.000E-04 | 1.367E-02 | 1.958E+02 | Shift of 1:2_complex     |

ORMS ERROR = 1.30E-03 MAX ERROR = 1.40E-03 AT OBS.NO. 8

RESIDUALS SQUARED = 8.42E-06

RFACTOR = 0.0092 PERCENT

| NO. | A | EXPT.      | DEL        | CALC.       | DEL         | RESIDUAL   | % DEV      | WEIGHT     | Guest(ONs) | Host(1) | pH |
|-----|---|------------|------------|-------------|-------------|------------|------------|------------|------------|---------|----|
| 1   | 1 | 9.5730E+00 | 9.5736E+00 | -6.4945E-04 | -6.7842E-03 | 1.0000E+00 | 5.0000E-04 | 1.0000E-03 | 0.0000E+00 |         |    |
| 2   | 1 | 9.6890E+00 | 9.6892E+00 | -1.9264E-04 | -1.9883E-03 | 1.0000E+00 | 1.0000E-03 | 1.0000E-03 | 0.0000E+00 |         |    |
| 3   | 1 | 9.7870E+00 | 9.7863E+00 | 7.3624E-04  | 7.5226E-03  | 1.0000E+00 | 1.5000E-03 | 1.0000E-03 | 0.0000E+00 |         |    |
| 4   | 1 | 9.8630E+00 | 9.8638E+00 | -7.5817E-04 | -7.6870E-03 | 1.0000E+00 | 2.0000E-03 | 1.0000E-03 | 0.0000E+00 |         |    |
| 5   | 1 | 9.9780E+00 | 9.9772E+00 | 8.3923E-04  | 8.4108E-03  | 1.0000E+00 | 3.0000E-03 | 1.0000E-03 | 0.0000E+00 |         |    |
| 6   | 1 | 1.0052E+01 | 1.0051E+01 | 8.6975E-04  | 8.6525E-03  | 1.0000E+00 | 4.0000E-03 | 1.0000E-03 | 0.0000E+00 |         |    |
| 7   | 1 | 1.0099E+01 | 1.0100E+01 | -1.3247E-03 | -1.3117E-02 | 1.0000E+00 | 5.0000E-03 | 1.0000E-03 | 0.0000E+00 |         |    |
| 8   | 1 | 1.0133E+01 | 1.0134E+01 | -1.3952E-03 | -1.3769E-02 | 1.0000E+00 | 6.0000E-03 | 1.0000E-03 | 0.0000E+00 |         |    |
| 9   | 1 | 1.0160E+01 | 1.0159E+01 | 1.2846E-03  | 1.2644E-02  | 1.0000E+00 | 7.0000E-03 | 1.0000E-03 | 0.0000E+00 |         |    |
| 10  | 1 | 1.0177E+01 | 1.0177E+01 | 1.8406E-04  | 1.8086E-03  | 1.0000E+00 | 8.0000E-03 | 1.0000E-03 | 0.0000E+00 |         |    |

TOLERANCE ON SUM OF SQUARES 0.0100

TOLERANCE ON EIGEN VALUES 0.0001

CONVERGANCE AFTER 8 ITERATIONS

## Data fitting of the NMR titrations ( $1 + \text{DenS}^-$ )<sup>5</sup>

Calculations by WinEQNMR2 Version 2.00 by Michael J. Hynes

Program run at 19:33:52 on 12/07/2010

Reactions:  $M + L = ML$  ( $\beta_1 = K_1$ );  $M + 2L = (ML)_2$  ( $\beta_2 = K_1K_2$ )

Data 2010 05 14

==== Anion Recognition ====

Equilibrium constants are  $\log_{10}$  values

NO. A PARAMETER DELTA ERROR CONDITION DESCRIPTION

|   |   |             |           |           |           |                          |
|---|---|-------------|-----------|-----------|-----------|--------------------------|
| 1 | 1 | 3.68282E+00 | 1.000E-01 | 1.785E-01 | 1.444E+03 | Stability constant(K1)   |
| 2 | 1 | 5.86840E+00 | 1.000E-01 | 3.552E-01 | 7.728E+03 | Stability constant(K1K2) |
| 3 | 1 | 9.44991E+00 | 1.000E-06 | 2.259E-03 | 1.498E+00 | Shift of 1               |
| 4 | 1 | 9.79416E+00 | 1.000E-02 | 3.263E-02 | 1.703E+03 | Shift of 1:1_complex     |
| 5 | 1 | 1.00910E+01 | 1.000E-02 | 3.728E-02 | 5.218E+02 | Shift of 1:2_complex     |

ORMS ERROR = 1.52E-03 MAX ERROR = 2.45E-03 AT OBS.NO. 2

RESIDUALS SQUARED = 1.16E-05

RFACTOR = 0.0110 PERCENT

| NO. | A | EXPT.      | DEL        | CALC.       | DEL         | RESIDUAL   | % DEV      | WEIGHT     | Guest(DenS) | Host(1) | pH |
|-----|---|------------|------------|-------------|-------------|------------|------------|------------|-------------|---------|----|
| 1   | 1 | 9.5790E+00 | 9.5794E+00 | -4.2248E-04 | -4.4105E-03 | 1.0000E+00 | 5.0000E-04 | 1.0000E-03 | 0.0000E+00  |         |    |
| 2   | 1 | 9.6780E+00 | 9.6756E+00 | 2.4452E-03  | 2.5266E-02  | 1.0000E+00 | 1.0000E-03 | 1.0000E-03 | 0.0000E+00  |         |    |
| 3   | 1 | 9.7370E+00 | 9.7389E+00 | -1.9217E-03 | -1.9736E-02 | 1.0000E+00 | 1.5000E-03 | 1.0000E-03 | 0.0000E+00  |         |    |
| 4   | 1 | 9.7780E+00 | 9.7786E+00 | -6.2180E-04 | -6.3591E-03 | 1.0000E+00 | 2.0000E-03 | 1.0000E-03 | 0.0000E+00  |         |    |
| 5   | 1 | 9.8290E+00 | 9.8288E+00 | 2.2316E-04  | 2.2704E-03  | 1.0000E+00 | 3.0000E-03 | 1.0000E-03 | 0.0000E+00  |         |    |
| 6   | 1 | 9.8620E+00 | 9.8618E+00 | 1.6499E-04  | 1.6729E-03  | 1.0000E+00 | 4.0000E-03 | 1.0000E-03 | 0.0000E+00  |         |    |
| 7   | 1 | 9.8870E+00 | 9.8865E+00 | 4.7398E-04  | 4.7939E-03  | 1.0000E+00 | 5.0000E-03 | 1.0000E-03 | 0.0000E+00  |         |    |
| 8   | 1 | 9.9060E+00 | 9.9062E+00 | -1.6022E-04 | -1.6174E-03 | 1.0000E+00 | 6.0000E-03 | 1.0000E-03 | 0.0000E+00  |         |    |
| 9   | 1 | 9.9230E+00 | 9.9223E+00 | 6.9237E-04  | 6.9774E-03  | 1.0000E+00 | 7.0000E-03 | 1.0000E-03 | 0.0000E+00  |         |    |
| 10  | 1 | 9.9350E+00 | 9.9358E+00 | -7.6008E-04 | -7.6505E-03 | 1.0000E+00 | 8.0000E-03 | 1.0000E-03 | 0.0000E+00  |         |    |

TOLERANCE ON SUM OF SQUARES 0.0100

TOLERANCE ON EIGEN VALUES 0.0001

CONVERGANCE AFTER 7 ITERATIONS

## References

- (1) R. Kuroda, T. Harada and Y. Shindo, *Rev. Sci. Instrum.*, 2001, **72**, 3802.
- (2) G. M. Sheldrick, *Acta Cryst.*, 2008, **A64**, 112.
- (3) A. L. Spek, *Acta Cryst.*, 2009, **D65**, 148.
- (4) See: <http://www.ccdc.cam.ac.uk/products/mercury/>
- (5) WinEQNMR2, see: M. J. Hynes, *J. Chem. Soc. Dalton Trans.*, 1993, 311.
- (6) M. Fukuda, R. Sekiya and R. Kuroda, *Angew. Chem. Int. Ed.*, 2008, **47**, 706.
- (7) D. Xie, M. Jiang, G. Zhang and D. Chen, *Chem. Eur. J.*, 2007, **13**, 3346.
- (8) A. K. Rappe', K. S. Colwell and C. J. Casewit, *Inorg. Chem.*, 1993, **32**, 3438.
- (9) Since bridging ligand **L** is slightly soluble in CH<sub>2</sub>Cl<sub>2</sub>, CHCl<sub>3</sub>, and THF, small amount of **1** was decomposed and free **L** dissolved in the mixed solvent solutions.
